# Supplementary material for: Deep Learning in Image Cytometry: A Review
Source: PubMed Central journal article supplement — Cytometry A. 2018 Dec 19;95(4):366–80. doi: 10.1002/cyto.a.23701 (PMC6590257; doi:10.1002/cyto.a.23701), 2018-12-19
Supplement: CYTO-95-366-s001.pdf [file CYTO-95-366-s001.pdf]

| id | Author                      | paper                                                                                                                                                               | DOI                                                                                                                                                                                                                                         | Task | Mode   | Application | Summary                                                                                                                                             |
|----|-----------------------------|---------------------------------------------------------------------------------------------------------------------------------------------------------------------|---------------------------------------------------------------------------------------------------------------------------------------------------------------------------------------------------------------------------------------------|------|--------|-------------|-----------------------------------------------------------------------------------------------------------------------------------------------------|
| 28 | Sadanandan SK et al. (2016) | Feature augmented deep neural networks for segmentation of cells                                                                                                    | <a href="http://doi.org/10.1007/978-3-319-46604-0_17">http://doi.org/10.1007/978-3-319-46604-0_17</a>                                                                                                                                       | S    | BF, FL | CL          | Improved segmentation using hessian (2nd order derivative) and wavelet filtering of the images with raw inputs to a CNN model.                      |
| 35 | Su H et al. (2015)          | Robust Cell Detection and Segmentation in Histopathological Images Using Sparse Reconstruction and Stacked Denoising Autoencoders                                   | <a href="https://doi.org/10.1007/978-3-319-24574-4_46">https://doi.org/10.1007/978-3-319-24574-4_46</a>                                                                                                                                     | S    | BF     | T           | Improved brain tumor and lung cancer diagnosis by segmenting and detecting cells using a stacked denoising autoencoder.                             |
| 36 | Rivenson Y et al. (2017)    | Deep learning microscopy: Enhancing resolution, field-of-view and depth-of-field of optical microscopy images using neural networks                                 | <a href="http://doi.org/10.1364/CLEO_AT.2018.AM1J.5">http://doi.org/10.1364/CLEO_AT.2018.AM1J.5</a>                                                                                                                                         | P    | BF     | T           | Enhanced optical microscopy image resolution, depth of field, and field of view without any imaging system modification using a CNN model.          |
| 37 | Rivenson Y et al. (2018)    | Deep Learning Enhanced Mobile-Phone Microscopy                                                                                                                      | <a href="http://doi.org/10.1021/acsphtonic.8b00146">http://doi.org/10.1021/acsphtonic.8b00146</a>                                                                                                                                           | P    | BF     | T           | Improved mobile phone-based optical image reconstruction by removing distortions and denoising using the CNN model.                                 |
| 38 | Weigert M et al. (2017)     | Content-Aware Image Restoration: Pushing the Limits of Fluorescence Microscopy                                                                                      | <a href="https://doi.org/10.1101/236463">https://doi.org/10.1101/236463</a>                                                                                                                                                                 | P    | FL     | CL          | Image restoration of several different cells using a U-Net model.                                                                                   |
| 39 | Wang H et al. (2018)        | Deep learning achieves super-resolution in fluorescence microscopy                                                                                                  | <a href="https://doi.org/10.1101/309641">https://doi.org/10.1101/309641</a>                                                                                                                                                                 | P    | FL     | SB          | Superresolution reconstruction of low-resolution images into high-resolution images using GAN model.                                                |
| 40 | Ouyang W et al. (2018)      | Deep learning massively accelerates super-resolution localization microscopy                                                                                        | <a href="http://doi.org/10.1038/nbt.4106">http://doi.org/10.1038/nbt.4106</a>                                                                                                                                                               | P    | FL     | SB          | Super-resolution views reconstruction from sparse rapidly acquired localization images and/or widefield images using a CNN model.                   |
| 41 | Nehme E et al. (2018)       | Deep-STORM: Super-resolution single-molecule microscopy by deep learning                                                                                            | <a href="http://doi.org/10.1364/OPTICA.5.000458">http://doi.org/10.1364/OPTICA.5.000458</a>                                                                                                                                                 | P    | FL     | SB          | Ultrafast and Improved superresolution image reconstruction from fluorescent molecules for localization microscopy using a CNN model.               |
| 44 | Tellez D et al. (2018)      | H and E stain augmentation improves generalization of convolutional networks for histopathological mitosis detection                                                | <a href="http://doi.org/10.1117/12.2293048">http://doi.org/10.1117/12.2293048</a>                                                                                                                                                           | C,P  | BF     | T           | Improved classification of HE histological tissue sections by augmenting the image data for a CNN classifier.                                       |
| 47 | Ciresan D et al. (2012)     | Deep Neural Networks Segment Neuronal Membranes in Electron Microscopy Images                                                                                       | <a href="https://papers.nips.cc/paper/4741-deep-neural-networks-segment-neuronalmembranes-in-electron-microscopy-images">https://papers.nips.cc/paper/4741-deep-neural-networks-segment-neuronalmembranes-in-electron-microscopy-images</a> | S    | EM     | CL,SB       | Automated segmentation of neuronal structures in stacks of EM images to map 3D brain structures and connectivity using a pixel-wise CNN classifier. |
| 48 | Ronneberger O et al. (2015) | U-Net: Convolutional Networks for Biomedical Image Segmentation                                                                                                     | <a href="https://doi.org/10.1007/978-3-319-24574-4_28">https://doi.org/10.1007/978-3-319-24574-4_28</a>                                                                                                                                     | S    | EM     | T,CL        | Improved segmentation of neuronal structures with a U-Net neural network                                                                            |
| 49 | Çiçek Ö et al. (2016)       | 3D U-Net: Learning Dense Volumetric Segmentation from Sparse Annotation                                                                                             | <a href="https://doi.org/10.1007/978-3-319-46723-8_49">https://doi.org/10.1007/978-3-319-46723-8_49</a>                                                                                                                                     | S    | FL     | SB          | Automated volumetric segmentation using a CNN model to learn from sparsely annotated volumetric images.                                             |
| 50 | Sadanandan K et al. (2017)  | Spheroid Segmentation Using Multiscale Deep Adversarial Networks                                                                                                    | <a href="https://doi.org/10.1109/iccvw.2017.11">https://doi.org/10.1109/iccvw.2017.11</a>                                                                                                                                                   | S    | BF     | CL          | Improved segmentation of different types of spheroids cells in bright-field microscopy images using a new multiscale GAN model.                     |
| 51 | Arbelle A et al. (2017)     | Microscopy cell segmentation via adversarial neural networks                                                                                                        | <a href="https://doi.org/10.1109/isbi.2018.8363657">https://doi.org/10.1109/isbi.2018.8363657</a>                                                                                                                                           | S    | FL     | CL          | Automated cell segmentation with limited amount of annotated data using Generative adversarial neural network (GAN) model.                          |
| 54 | Haering M et al. (2018)     | Automated Segmentation of Epithelial Tissue Using Cycle-Consistent Generative Adversarial Networks                                                                  | <a href="https://doi.org/10.1101/311373">https://doi.org/10.1101/311373</a>                                                                                                                                                                 | S    | BF     | T           | Automated segmentation using cycle consistent GAN's trained with weakly prepared image - mask pairs.                                                |
| 58 | Hung J et al. (2017)        | Applying Faster R-CNN for Object Detection on Malaria Images                                                                                                        | <a href="http://doi.ieeecomputersociety.org/10.1109/CVPRW.2017.112">http://doi.ieeecomputersociety.org/10.1109/CVPRW.2017.112</a>                                                                                                           | C    | BF     | CL          | Identification and recognition of malaria-infected blood cells stages in brightfield microscopy images using a CNN model.                           |
| 59 | Ciresan C et al. (2013)     | Mitosis Detection in Breast Cancer Histology Images with Deep Neural Networks                                                                                       | <a href="https://doi.org/10.1007/978-3-642-40763-5_51">https://doi.org/10.1007/978-3-642-40763-5_51</a>                                                                                                                                     | C    | BF     | T           | Detection of the mitotic tissue in breast histology images using a deep max-pooling pixel-wise CNN classifier.                                      |
| 61 | Mao Y et al. (2015)         | A hierarchical convolutional neural network for mitosis detection in phase-contrast microscopy images                                                               | <a href="http://doi.org/10.1007/978-3-319-46723-8_79">http://doi.org/10.1007/978-3-319-46723-8_79</a>                                                                                                                                       | C    | BF     | CL          | Automated mitosis event detection in time-lapse phase contrast microscopy using Hierarchical CNN model.                                             |
| 62 | Durant J et al. (2016)      | Very Deep Convolutional Neural Networks for Morphologic Classification of Erythrocytes                                                                              | <a href="https://doi.org/10.1373/clinchem.2017.276345">https://doi.org/10.1373/clinchem.2017.276345</a>                                                                                                                                     | C    | BF     | CL          | Performance evaluation of morphological erythrocytes classification using a CNN classifier.                                                         |
| 63 | Fleury D et al. (2018)      | Implementation of Regional-CNN and SSD Machine Learning Object Detection Architectures for the Real Time Analysis of Blood Borne Pathogens in Dark Field Microscopy | <a href="https://doi.org/10.20944/preprints201807.0119.v1">https://doi.org/10.20944/preprints201807.0119.v1</a>                                                                                                                             | C    | BF     | CL          | Comparative investigation of the disparities between Single Shot Detector (SSD), Mobilenet V1 and the Faster R-CNN Inception V2 model.              |

|    |                           |                                                                                                                                                                            |                                                                                                         |      |    |          |                                                                                                                                                            |
|----|---------------------------|----------------------------------------------------------------------------------------------------------------------------------------------------------------------------|---------------------------------------------------------------------------------------------------------|------|----|----------|------------------------------------------------------------------------------------------------------------------------------------------------------------|
| 67 | Wei L et al. (2018)       | Neural network control of focal position during time-lapse microscopy of cells                                                                                             | <a href="http://doi.org/10.1038/s41598-018-25458-w">http://doi.org/10.1038/s41598-018-25458-w</a>       | P    | BF | CLLLLLLL | <b>Autofocusing of bright-field and phase-contrast microscopy using a CNN model.</b>                                                                       |
| 70 | Campanella G et al.       | Terabyte-scale Deep Multiple Instance Learning for Classification and Localization in Pathology                                                                            | <a href="https://arxiv.org/abs/1805.06983">https://arxiv.org/abs/1805.06983</a>                         | C    | BF | T        | <b>Improved prostate cancer diagnosis by classifying digital tissue slides on a large scale using deep multiple instance learning-based CNN framework.</b> |
| 72 | Kensert A et al. (2018)   | Transfer learning with deep convolutional neural networks for classifying cellular morphological changes                                                                   | <a href="https://doi.org/10.1101/345728">https://doi.org/10.1101/345728</a>                             | C    | FL | CL       | <b>Prediction of cellular phenotypes mechanisms in response to chemical perturbations using a pre-trained CNN classifier.</b>                              |
| 73 | Pawlowski N et al.        | Automating Morphological Profiling with Generic Deep Convolutional Networks                                                                                                | <a href="https://doi.org/10.1101%2F085118">https://doi.org/10.1101%2F085118</a>                         | C    | FL | CL       | <b>Automated feature extraction for morphological profiling using a pre-trained CNN classifier.</b>                                                        |
| 77 | Yu X et al. (2018)        | Classify epithelium-stroma in histopathological images based on deep transferable network                                                                                  | <a href="http://doi.org/10.1111/jmi.12705">http://doi.org/10.1111/jmi.12705</a>                         | C    | BF | T        | <b>Unsupervised domain adaptation for epithelium-stroma classification using a pre-trained CNN classifier</b>                                              |
| 78 | Eulenberg P et al. (2017) | Reconstructing cell cycle and disease progression using deep learning                                                                                                      | <a href="https://doi.org/10.1038/s41467-017-00623-3">https://doi.org/10.1038/s41467-017-00623-3</a>     | C, P | FL | CL       | <b>Automated reconstruction of biological processes from raw images by combining non-linear dimension reduction technique with a CNN model.</b>            |
| 79 | Doan M et al. (2018)      | Label-free assessment of red blood cell storage lesions by deep learning                                                                                                   | <a href="https://doi.org/10.1101/256180">https://doi.org/10.1101/256180</a>                             | C    | BF | CL       | <b>Automated red blood cells morphologies characterization using a CNN classifier for label-free imaging flow cytometry.</b>                               |
| 80 | Dürr O et al. (2016)      | Single-Cell Phenotype Classification Using Deep Convolutional Neural Networks                                                                                              | <a href="https://doi.org/10.1177/1087057116631284">https://doi.org/10.1177/1087057116631284</a>         | C    | FL | CL       | <b>High-content screening-based phenotype classification using CNN classifiers.</b>                                                                        |
| 81 | Pärnamaa T et al. (2017)  | Accurate classification of protein subcellular localization from high-throughput microscopy images using deep learning                                                     | <a href="http://doi.org/10.1534/g3.116.033654">http://doi.org/10.1534/g3.116.033654</a>                 | C    | FL | SB       | <b>Automated detection of the fluorescently-tagged protein cellular compartment in yeast cells using CNN classifier.</b>                                   |
| 82 | Kraus Z et al. (2017)     | Automated analysis of high-content microscopy data with deep learning                                                                                                      | <a href="https://doi.org/10.15252/msb.20177551">https://doi.org/10.15252/msb.20177551</a>               | C    | FL | SB       | <b>Automated classification and localization of protein subcellular structures in yeast cell microscopy images using a localize CNN.</b>                   |
| 83 | Sommer C et al. (2017)    | A Deep Learning And Novelty Detection Framework For Rapid Phenotyping In High-Content Screening                                                                            | <a href="https://doi.org/10.1101/134627">https://doi.org/10.1101/134627</a>                             | C    | FL | CL       | <b>Creation of a deep learning pipeline for analyzing high-content screening data.</b>                                                                     |
| 84 | Young H et al. (2017)     | Real-time Image Processing for Microscopy-based Label-free Imaging Flow Cytometry in a Microfluidic Chip                                                                   | <a href="http://doi.org/10.1038/s41598-017-11534-0">http://doi.org/10.1038/s41598-017-11534-0</a>       | C    | FL | CL       | <b>Automated detection of objects in high-throughput microscopy-based label-free IFC in a microfluidic chip using a CNN classifier.</b>                    |
| 87 | Zhang L et al. (2017)     | DeepPap: Deep Convolutional Networks for Cervical Cell Classification.                                                                                                     | <a href="https://doi.org/10.1109/IBHI.2017.2705583">https://doi.org/10.1109/IBHI.2017.2705583</a>       | C    | BF | CL       | <b>Improved cervical cell classification using a pre-trained CNN classifier.</b>                                                                           |
| 88 | Song Y et al. (2016)      | Accurate Cervical Cell Segmentation from Overlapping Clumps in Pap Smear Images                                                                                            | <a href="https://doi.org/10.1109/tmi.2016.2606380">https://doi.org/10.1109/tmi.2016.2606380</a>         | S    | BF | CL       | <b>Automated pre-cancer identification by improved segmentation of cervical cells using a multi-scale CNN for encoding distinct cell appearances.</b>      |
| 90 | Cruz-Roa A et al. (2017)  | High-throughput adaptive sampling for whole-slide histopathology image analysis (HASHI) via convolutional neural networks: Application to invasive breast cancer detection | <a href="https://doi.org/10.1371/journal.pone.0196828">https://doi.org/10.1371/journal.pone.0196828</a> | C    | BF | T        | <b>Improved invasive breast cancer tissues detection on whole-slide images by combining adaptive sampling method with a CNN classifier.</b>                |
| 91 | Litjens G et al. (2016)   | Deep learning as a tool for increased accuracy and efficiency of histopathological diagnosis                                                                               | <a href="https://doi.org/10.1038/srep26286">https://doi.org/10.1038/srep26286</a>                       | C    | BF | T        | <b>Improved prostate cancer identification and breast cancer metastasis detection in sentinel lymph nodes using CNN-based classifier.</b>                  |
| 92 | Veta M et al. (2018)      | Predicting breast tumor proliferation from whole-slide images: the TUPAC16 challenge.                                                                                      | <a href="https://arxiv.org/abs/1807.08284">https://arxiv.org/abs/1807.08284</a>                         | C, S | BF | T        | <b>Presents the broad adoption of CNN models for breast cancer tumor proliferation challenge.</b>                                                          |
| 93 | Gecer B et al. (2018)     | Detection and classification of cancer in whole slide breast histopathology images using deep convolutional networks                                                       | <a href="https://doi.org/10.1016/j.patcog.2018.07.022">https://doi.org/10.1016/j.patcog.2018.07.022</a> | C    | BF | T        | <b>Automated classification of whole slide images (WSI) of breast biopsies into five diagnostic categories using a CNN classifier.</b>                     |
| 94 | Bejnordi E et al. (2017)  | Context-aware stacked convolutional neural networks for classification of breast carcinomas in whole-slide histopathology images                                           | <a href="https://doi.org/10.1117/1.jmi.4.4.044504">https://doi.org/10.1117/1.jmi.4.4.044504</a>         | C    | BF | T        | <b>Breast cancer tissue classification by stacking two CNN's for improved feature learning of cellular details and global tissue structures.</b>           |
| 95 | Bejnordi B et al. (2018)  | Using deep convolutional neural networks to identify and classify tumor-associated stroma in diagnostic breast biopsies                                                    | <a href="http://doi.org/10.1038/s41379-018-0073-z">http://doi.org/10.1038/s41379-018-0073-z</a>         | C    | BF | T        | <b>Mammographic abnormalities identification in digital images of benign and malignant HE-stained tissue sections using CNN models.</b>                    |
| 96 | Bychkov D et al. (2018)   | Deep learning based tissue analysis predicts outcome in colorectal cancer                                                                                                  | <a href="https://doi.org/10.1038/s41598-018-21758-3">https://doi.org/10.1038/s41598-018-21758-3</a>     | C    | BF | T        | <b>Colorectal cancer patient outcome prediction from the tumor tissue images using CNN- and RNN-based classifiers.</b>                                     |

|     |                                  |                                                                                                                                                |                                                                                                                   |      |        |           |                                                                                                                                                       |
|-----|----------------------------------|------------------------------------------------------------------------------------------------------------------------------------------------|-------------------------------------------------------------------------------------------------------------------|------|--------|-----------|-------------------------------------------------------------------------------------------------------------------------------------------------------|
| 98  | Qaiser T et al. (2018)           | HER2 challenge contest: a detailed assessment of automated HER2 scoring algorithms in whole slide images of breast cancer tissues              | <a href="https://doi.org/10.1111/his.13333">https://doi.org/10.1111/his.13333</a>                                 | P,C  | BF     | T         | Benchmark for performance comparison of invasive breast carcinoma tissues stained with both HE and IHC for HER2 scoring using CNN models.             |
| 99  | Sirinukunwattana K et al. (2017) | Gland segmentation in colon histology images: The glas challenge contest                                                                       | <a href="https://doi.org/10.1016/j.media.2016.08.008">https://doi.org/10.1016/j.media.2016.08.008</a>             | S    | BF     | T         | A comprehensive overview of methods applied for segmenting the gland in colon histology images challenge contest.                                     |
| 100 | Akram SU et al. (2017)           | Cell segmentation proposal network for microscopy image analysis                                                                               | <a href="http://doi.org/10.1007/978-3-319-46976-8_3">http://doi.org/10.1007/978-3-319-46976-8_3</a>               | C, S | FL, BF | CL        | Automated detection and segmentation for tracking cells in time-lapse images using regional CNN model.                                                |
| 101 | Wang M et al. (2018)             | Multicell migration tracking within angiogenic networks by deep learning-based segmentation and augmented Bayesian filtering                   | <a href="http://doi.org/10.1117/1.JMI.5.2.024005">http://doi.org/10.1117/1.JMI.5.2.024005</a>                     | S    | BF     | CL        | Automated cell detection by combining CNN with backward Kalman filtering for tracking.                                                                |
| 102 | Phan H et al. (2017)             | An unsupervised long short-term memory neural network for event detection in cell videos                                                       | <a href="https://arxiv.org/abs/1709.02081">https://arxiv.org/abs/1709.02081</a>                                   | C    | BF     | CL        | Automated unsupervised cell event detection and classification in cell video sequences using convolutional recurrent neural networks.                 |
| 104 | Kimmel J et al. (2018)           | Deep convolutional and recurrent neural networks for cell motility discrimination and prediction                                               | <a href="https://doi.org/10.1101/159202">https://doi.org/10.1101/159202</a>                                       | C    | FL, BF | CL        | Classification of different motility behaviors of cells in cultures using 3D CNN and RNN along with autoencoders for unsupervised learning.           |
| 105 | Wang C et al. (2017)             | vU-net: accurate cell edge segmentation in time-lapse fluorescence live cell images based on convolutional neural network                      | <a href="https://doi.org/10.1101/191858">https://doi.org/10.1101/191858</a>                                       | S    | FL     | CL        | Reconstruction of cell edges in time-lapse imagery by integrating a pre-trained encoder and a U-Net model.                                            |
| 106 | Su Y-T et al. (2017)             | Spatiotemporal Joint Mitosis Detection Using CNN-LSTM Network in Time-Lapse Phase Contrast Microscopy Images                                   | <a href="http://doi.org/10.1109/ACCESS.2017.2745544">http://doi.org/10.1109/ACCESS.2017.2745544</a>               | C    | BF     | CL        | Detection of mitotic events in patch sequences by combining CNN and RNN.                                                                              |
| 107 | Tellez D et al. (2018)           | Whole-Slide Mitosis Detection in H&E Breast Histology Using PHH3 as a Reference to Train Distilled Stain-Invariant Convolutional Networks      | <a href="https://doi.org/10.1109/tmi.2018.2820199">https://doi.org/10.1109/tmi.2018.2820199</a>                   | C    | BF     | T         | Automated detection of mitotic figures in breast cancer tissue sections using a CNN classifier.                                                       |
| 108 | Sadanandan K et al. (2017)       | Automated Training of Deep Convolutional Neural Networks for Cell Segmentation                                                                 | <a href="https://doi.org/10.1038/s41598-017-07599-6">https://doi.org/10.1038/s41598-017-07599-6</a>               | S    | FL     | CL        | Automated segmentation of cells with training done with fluorescent proteins enabled over the last frame.                                             |
| 121 | Ishaq O et al. (2017)            | Deep Fish: Deep Learning-Based Classification of Zebrafish Deformation for High-Throughput Screening                                           | <a href="https://doi.org/10.1177/1087057116667894">https://doi.org/10.1177/1087057116667894</a>                   | C    | BF     | ○         | Improved high-throughput classification of whole-body zebrafish deformations in multi-fish microwell plates using a CNN classifier.                   |
| 126 | Mobadersany P et al. (2018)      | Predicting cancer outcomes from histology and genomics using convolutional networks                                                            | <a href="https://doi.org/10.1101/198010">https://doi.org/10.1101/198010</a>                                       | C    | BF     | T         | Automated patient outcome prediction from digital pathology images by combining traditional survival models with a CNN classifier.                    |
| 128 | Turkki R et al. (2016)           | Antibody-supervised deep learning for quantification of tumor-infiltrating immune cells in hematoxylin and eosin stained breast cancer samples | <a href="https://doi.org/10.4103/2153-3539.189703">https://doi.org/10.4103/2153-3539.189703</a>                   | C    | BF     | T         | Improved quantification of immune cell-rich areas in HE-stained image samples using a CNN classifier.                                                 |
| 131 | Xie Y et al. (2015)              | Deep Voting and Structured Regression for Microscopy Image Analysis                                                                            | <a href="http://doi.org/10.1016/B978-0-12-810408-8.00009-2">http://doi.org/10.1016/B978-0-12-810408-8.00009-2</a> | C    | FL     | CL        | Automated nucleus centroids localization for voting confidence of overlapping cells using a CNN-based structured regression model.                    |
| 138 | Arteta C et al.                  | HTX: a tool for the exploration and visualization of high-throughput image assays                                                              | <a href="https://doi.org/10.1101/204016">https://doi.org/10.1101/204016</a>                                       | P    | BF, FL | T, CL, SB | Interactive visualizing of image-based assays based on visual similarities between the samples for improved exploration of large microscopy datasets. |
| 139 | Arvaniti E et al.                | Automated Gleason grading of prostate cancer tissue microarrays via deep learning                                                              | <a href="https://doi.org/10.1038/s41598-018-30535-1">https://doi.org/10.1038/s41598-018-30535-1</a>               | C    | BF     | T         | Automated Gleason grading of prostate cancer tissue microarrays with H&E staining using a patch-based CNN classifier.                                 |
| 140 | Auberville M et al.              | Deep learning-based detection of motion artifacts in probe-based confocal laser endomicroscopy images                                          | <a href="http://doi.org/10.1007/s11548-018-1836-1">http://doi.org/10.1007/s11548-018-1836-1</a>                   | C    | BF     | T         | Motion artifacts detection of epithelial tissue from the oral cavity and the vocal folds by fine-tuning a pre-trained CNN classifier.                 |
| 141 | Awan R et al.                    | Context-Aware Learning Using Transferable Features for Classification of Breast Cancer Histology Images                                        | <a href="https://doi.org/10.1007/978-3-319-93000-8_89">https://doi.org/10.1007/978-3-319-93000-8_89</a>           | C    | BF     | T         | Breast cancer tissue classification using the encoded representation of a patch-based CNN within an SVM classifier.                                   |
| 142 | Bajic B et al.                   | Denosing of short exposure transmission electron microscopy images for ultrastructural enhancement                                             | <a href="http://doi.org/10.1109/ISBI.2018.8363721">http://doi.org/10.1109/ISBI.2018.8363721</a>                   | P    | EM     | SB        | Automated denosing of short-exposure high-resolution TEM images of cilia using a multi-stream CNN model.                                              |
| 143 | Baltissen D et al.               | Comparison of segmentation methods for tissue microscopy images of glioblastoma cells                                                          | <a href="http://doi.org/10.1109/ISBI.2018.8363601">http://doi.org/10.1109/ISBI.2018.8363601</a>                   | S    | FL     | CL        | Automated glioblastoma cell nuclei segmentation in tissue microscopy images using atrous spatial pyramid pooling (ASPP) for a CNN model.              |
| 144 | Bekkers EJ et al.                | Roto-Translation Covariant Convolutional Networks for Medical Image Analysis                                                                   | <a href="http://arxiv.org/abs/1804.03393v3">http://arxiv.org/abs/1804.03393v3</a>                                 | S    | EM, FL | T, CL     | Improved segmentation in histopathology, retinal imaging, and electron microscopy images using a CNN model trained without any augmentations.         |

|     |                     |                                                                                                                                                   |                                                                                                     |      |        |      |                                                                                                                                                  |
|-----|---------------------|---------------------------------------------------------------------------------------------------------------------------------------------------|-----------------------------------------------------------------------------------------------------|------|--------|------|--------------------------------------------------------------------------------------------------------------------------------------------------|
| 145 | Bentaieb A et al.   | Multi-loss convolutional networks for gland analysis in microscopy                                                                                | <a href="http://doi.org/10.1109/ISBI.2016.7493349">http://doi.org/10.1109/ISBI.2016.7493349</a>     | C, S | BF     | T,CL | Colon adenocarcinomas segmentation and classification using a single CNN framework for automated cancer tissue analysis.                         |
| 146 | Boyd N et al.       | DeepLoco: Fast 3D Localization Microscopy Using Neural Networks                                                                                   | <a href="https://doi.org/10.1101/267096">https://doi.org/10.1101/267096</a>                         | C    | FL     | SB   | Automated estimation of fluorophores number and locations in a single frame of super-resolution microscopy using a CNN model.                    |
| 147 | Bozkurt A et al.    | A Multiresolution Convolutional Neural Network with Partial Label Training for Annotating Reflectance Confocal Microscopy Images of Skin          | <a href="http://arxiv.org/abs/1802.02213v2">http://arxiv.org/abs/1802.02213v2</a>                   | S    | BF     | T    | Automated annotations of morphological patterns using U-Net architecture for improved skin cancer diagnosis in reflectance confocal microscopy.  |
| 148 | Bozkurt A et al.    | Delineation of Skin Strata in Reflectance Confocal Microscopy Images with Recurrent Convolutional Networks                                        | <a href="http://doi.org/10.1109/CVPRW.2017.108">http://doi.org/10.1109/CVPRW.2017.108</a>           | C    | BF     | T    | Skin strata tissue classification in RCM image sequences using a recurrent CNN.                                                                  |
| 149 | Buggenthin F et al. | Prospective identification of hematopoietic lineage choice by deep learning                                                                       | <a href="http://doi.org/10.1038/nmeth.4182">http://doi.org/10.1038/nmeth.4182</a>                   | C    | BF     | CL   | Hematopoietic cell lineage choice prediction using a patch-based CNN classifier and a recurrent neural network (RNN) for cellular movement.      |
| 150 | Buniatyan D et al.  | Deep Learning Improves Template Matching by Normalized Cross Correlation                                                                          | <a href="http://arxiv.org/abs/1705.08593v1">http://arxiv.org/abs/1705.08593v1</a>                   | C    | EM     |      | Improved robustness of template matching by preprocessing images using a siamese CNN trained to maximize the contrast between NCC values.        |
| 151 | Caicedo C et al.    | Weakly supervised learning of single-cell feature embeddings                                                                                      | <a href="https://doi.org/10.1101/293431">https://doi.org/10.1101/293431</a>                         | P    | FL     | CL   | Automated downstream single cell analysis for replicating the treatment condition using a weakly supervised CNN model.                           |
| 152 | Caicedo JC et al.   | Evaluation of Deep Learning Strategies for Nucleus Segmentation in Fluorescence Images                                                            | <a href="https://doi.org/10.1101/335216">https://doi.org/10.1101/335216</a>                         | S    | FL     | CL   | Improved segmentation of cell nuclei in a large manually annotated dataset using a U-Net architecture.                                           |
| 153 | Calderon CP et al.  | Deep Convolutional Neural Network Analysis of Flow Imaging Microscopy Data to Classify Subvisible Particles in Protein Formulations               | <a href="http://doi.org/10.1016/j.xphs.2017.12.008">http://doi.org/10.1016/j.xphs.2017.12.008</a>   | C    | BF     | SB   | Process conditions prediction for therapeutic protein formulations by encoding the morphological features of subcellular structures using a CNN. |
| 154 | Cao G et al.        | A hybrid Cnn-Rf method for electron microscopy images segmentation                                                                                | <a href="http://doi.org/10.4172/1662-100X.1000114">http://doi.org/10.4172/1662-100X.1000114</a>     | S    | EM     | CL   | Automated segmentation of neuronal structures for 3d brain tissue reconstruction by combining hybrid CNN with Random Forest classifier.          |
| 155 | Carneiro G et al.   | Weakly-supervised structured output learning with flexible and latent graphs using high-order loss functions                                      | <a href="http://doi.org/10.1109/ICCV.2015.81">http://doi.org/10.1109/ICCV.2015.81</a>               | P    | BF, FL | T    | Estimation of the number and proportion of classes of microcirculatory supply units (MCSU) using a weakly annotated dataset for a CNN model.     |
| 156 | Carneiro G et al.   | Automatic Quantification of Tumour Hypoxia from Multi-Modal Microscopy Images Using Weakly-Supervised Learning Methods                            | <a href="http://doi.org/10.1109/TMI.2017.2677479">http://doi.org/10.1109/TMI.2017.2677479</a>       | P    | BF,FL  | T    | Improved validation of hypoxia-modified therapies to measure tumor hypoxia by classifying annotations using a weakly-supervised CNN model.       |
| 157 | Castilla C et al.   | Segmentation of actin-stained 3D fluorescent cells with filopodial protrusions using convolutional neural networks                                | <a href="http://doi.org/10.1109/ISBI.2018.8363605">http://doi.org/10.1109/ISBI.2018.8363605</a>     | S    | FL     | CL   | Automated segmentation of actin-stained cells in volumetric confocal microscopy images using a CNN model.                                        |
| 158 | Chang Y-H et al.    | Human induced pluripotent stem cell region recognition in microscopy images using Convolutional Neural Networks                                   | <a href="http://doi.org/10.1109/EMBC.2017.8037747">http://doi.org/10.1109/EMBC.2017.8037747</a>     | C    | BF     | CL   | Automated classification and recognition of induced pluripotent stem (iPS) cell regions behaviour using a CNN for aiding iPS cell culture.       |
| 159 | Chen L et al.       | Deep Learning in Label-free Cell Classification                                                                                                   | <a href="https://doi.org/10.1038/srep21471">https://doi.org/10.1038/srep21471</a>                   | C    | BF     | CL   | Improved phenotypic diagnosis by label-free cell classification in high-throughput quantitative imaging using a CNN classifier.                  |
| 160 | Chen J et al.       | Neuron segmentation using deep complete bipartite networks                                                                                        | <a href="http://doi.org/10.1007/978-3-319-66185-8_3">http://doi.org/10.1007/978-3-319-66185-8_3</a> | S    | FL     | CL   | Automatic segmentation of neuronal cells using a instance-wise annotations for a pixel-wise complete bipartite networks (CB-Net) model.          |
| 161 | Cheng H et al.      | Deep-learning-assisted Volume Visualization                                                                                                       | <a href="http://doi.org/10.1109/TVCG.2018.2796085">http://doi.org/10.1109/TVCG.2018.2796085</a>     | P    | EM     | SB   | Improved high-dimensional feature interactions for volume visualization based on the high-dimensional CNN features spectral methods.             |
| 162 | Cheng H-C et al.    | Volume segmentation using convolutional neural networks with limited training data                                                                | <a href="http://doi.org/10.1109/ICIP.2017.8296349">http://doi.org/10.1109/ICIP.2017.8296349</a>     | S    | EM     | SB   | Improved segmentation in volumetric microscopy images using factorized convolutions and online feature-level augmentations for a 3D CNN model.   |
| 163 | Chowdhury A et al.  | A computational study on convolutional feature combination strategies for grade classification in colon cancer using fluorescence microscopy data | <a href="http://doi.org/10.1117/12.2255687">http://doi.org/10.1117/12.2255687</a>                   | C    | BF     | T    | Automated colon cancer grade classification using the encoded representations of a pre-trained CNN within a linear SVM classifier.               |

|     |                        |                                                                                                                                         |                                                                                                       |      |        |       |                                                                                                                                                                     |
|-----|------------------------|-----------------------------------------------------------------------------------------------------------------------------------------|-------------------------------------------------------------------------------------------------------|------|--------|-------|---------------------------------------------------------------------------------------------------------------------------------------------------------------------|
| 164 | Chowdhury A et al.     | Blood vessel characterization using virtual 3D models and convolutional neural networks in fluorescence microscopy                      | <a href="http://doi.org/10.1109/ISBI.2017.7950599">http://doi.org/10.1109/ISBI.2017.7950599</a>       | C    | FL     | T     | <b>Automated characterization of microvessel morphology in micrographs of brain tissue sections using a CNN classifier for facile quantitative analysis.</b>        |
| 165 | Chowdhury A et al.     | Active deep learning reduces annotation burden in automatic cell segmentation                                                           | <a href="https://doi.org/10.1101/211060">https://doi.org/10.1101/211060</a>                           | S    | FL, BF | CL    | <b>Automated Cell segmentation using active learning for training a CNN model to reduce annotation burden.</b>                                                      |
| 166 | Christiansen EM et al. | In Silico Labeling: Predicting Fluorescent Labels in Unlabeled Images                                                                   | <a href="http://doi.org/10.1016/j.cell.2018.03.040">http://doi.org/10.1016/j.cell.2018.03.040</a>     | C    | BF     | SB    | <b>Multiple fluorescent labels prediction from transmitted-light images of unlabeled fixed or live biological cells using a CNN-based in silico labeling (ISL).</b> |
| 167 | Coudray N et al.       | Classification and Mutation Prediction from Non-Small Cell Lung Cancer Histopathology Images using Deep Learning                        | <a href="https://doi.org/10.1101/197574">https://doi.org/10.1101/197574</a>                           | C    | BF     | T     | <b>Classification of the whole-slide lung cell tissue images and prediction of mutated genes in lung adenocarcinoma using CNN-based classifiers.</b>                |
| 168 | Cruz-Roa A et al.      | Accurate and reproducible invasive breast cancer detection in whole-slide images: A Deep Learning approach for quantifying tumor extent | <a href="https://doi.org/10.1038/srep46450">https://doi.org/10.1038/srep46450</a>                     | C    | BF     | T     | <b>Detection of invasive ductal breast carcinoma tissue images using a CNN classifier for automated tumor extent assessment.</b>                                    |
| 169 | Delahunt CB et al.     | Automated microscopy and machine learning for expert-level malaria field diagnosis                                                      | <a href="http://doi.org/10.1109/GHTC.2015.7344002">http://doi.org/10.1109/GHTC.2015.7344002</a>       | C, P | BF     | T     | <b>Low-cost automated digital microscope for improved detection of malaria infectious diseases using CNN classifier.</b>                                            |
| 170 | Delas Peñas K et al.   | Analysis of Convolutional Neural Networks and Shape Features for Detection and Identification of Malaria Parasites on Thin Blood Smears | <a href="http://doi.org/10.1007/978-3-319-75420-8_45">http://doi.org/10.1007/978-3-319-75420-8_45</a> | C    | BF     | T     | <b>Improved malaria diagnosis using shape features with a CNN-based classifier.</b>                                                                                 |
| 171 | Deng F et al.          | Rich feature hierarchies for cell detecting under phase contrast microscopy images                                                      | <a href="http://doi.org/10.1109/ICIP.2015.7388195">http://doi.org/10.1109/ICIP.2015.7388195</a>       | C    | BF     | T     | <b>Automated detection of cells in phase contrast microscopy images using modified region-based CNN classifier.</b>                                                 |
| 172 | Diederich B et al.     | Using machine-learning to optimize phase contrast in a low-cost cellphone microscope                                                    | <a href="http://doi.org/10.1371/journal.pone.0192937">http://doi.org/10.1371/journal.pone.0192937</a> | P    | BF     | T     | <b>Real-time applications for a cellphone microscope to learn a relationship between samples and its optimal light source shapes by a CNN model.</b>                |
| 173 | Dong B et al.          | Deep learning for automatic cell detection in wide-field microscopy zebrafish images                                                    | <a href="http://doi.org/10.1109/ISBI.2015.7163986">http://doi.org/10.1109/ISBI.2015.7163986</a>       | C    | BF     | CL    | <b>Automated detection of tyrosine hydroxylase-containing cells in larval zebrafish brain wide-field microscopy images using a CNN classifier.</b>                  |
| 174 | Dorkenwald S et al.    | Automated synaptic connectivity inference for volume electron microscopy                                                                | <a href="http://doi.org/10.1038/nmeth.4206">http://doi.org/10.1038/nmeth.4206</a>                     | C    | EM     | CL,SB | <b>Automated identification of different cell types to infer a richly annotated synaptic connectivity by combining CNN and random forest classifier.</b>            |
| 175 | Drozdal M et al.       | Learning normalized inputs for iterative estimation in medical image segmentation                                                       | <a href="http://doi.org/10.1016/j.media.2017.11.005">http://doi.org/10.1016/j.media.2017.11.005</a>   | S    | BF     | SB    | <b>Automated workflow for segmentation by combing fully CNN with fully convolutional residual networks (FC-ResNets).</b>                                            |
| 176 | Fabijańska A et al.    | Segmentation of corneal endothelium images using a U-Net-based convolutional neural network                                             | <a href="http://doi.org/10.1016/j.artmed.2018.04.004">http://doi.org/10.1016/j.artmed.2018.04.004</a> | S    | BF     | O     | <b>Improved diagnosis of corneal endothelium by analyzing the size and shape of the endothelial cells in specular microscopy images using a CNN model.</b>          |
| 177 | Fakhry A et al.        | Residual Deconvolutional Networks for Brain Electron Microscopy Image Segmentation                                                      | <a href="http://doi.org/10.1109/TMI.2016.2613019">http://doi.org/10.1109/TMI.2016.2613019</a>         | S    | EM     | T     | <b>Improved segmentation using a multi-stream residual CNN that capture full-resolution features and contextual information of EM images.</b>                       |
| 178 | Fan M et al.           | Global probabilistic models for enhancing segmentation with convolutional networks                                                      | <a href="http://doi.org/10.1109/ISBI.2018.8363794">http://doi.org/10.1109/ISBI.2018.8363794</a>       | S    | FL     | CL    | <b>Efficient cell segmentations by enforcing prior shape constraints through combined global probabilistic model and a CNN model.</b>                               |
| 179 | Fredericksen MA et al. | Three-dimensional visualization and a deep-learning model reveal complex fungal parasite networks in behaviorally manipulated ants      | <a href="http://doi.org/10.1073/pnas.1711673114">http://doi.org/10.1073/pnas.1711673114</a>           | S    | EM     | CL    | <b>Identification of a microbial parasite adaptation in the body of its coevolved and manipulated host using CNN models.</b>                                        |
| 180 | Fu C et al.            | Three Dimensional Fluorescence Microscopy Image Synthesis and Segmentation                                                              | <a href="http://arxiv.org/abs/1801.07198v2">http://arxiv.org/abs/1801.07198v2</a>                     | S    | FL     | CL    | <b>Improved characterization and analysis of 3D microscopy images by nuclei segmentation using spatially constrained cycle-consistent GAN model.</b>                |
| 181 | Fu C et al.            | Nuclei segmentation of fluorescence microscopy images using convolutional neural networks                                               | <a href="http://doi.org/10.1109/ISBI.2017.7950617">http://doi.org/10.1109/ISBI.2017.7950617</a>       | S    | FL     | CL,T  | <b>Automated segmentation and counting of the nucleus in volumetric images using a CNN model and a watershed technique.</b>                                         |
| 182 | Funke J et al.         | Large Scale Image Segmentation with Structured Loss based Deep Learning for Connectome Reconstruction                                   | <a href="http://doi.org/10.1109/TPAMI.2018.2835450">http://doi.org/10.1109/TPAMI.2018.2835450</a>     | S    | EM     | T     | <b>Automated prediction of affinities between voxels, followed by iterative region agglomeration using a 3D U-Net architecture.</b>                                 |

|     |                          |                                                                                                                                       |                                                                                                         |      |          |        |                                                                                                                                                   |
|-----|--------------------------|---------------------------------------------------------------------------------------------------------------------------------------|---------------------------------------------------------------------------------------------------------|------|----------|--------|---------------------------------------------------------------------------------------------------------------------------------------------------|
| 183 | Galal S et al.           | Candy Cane: Breast Cancer Pixel-Wise Labeling with Fully Convolutional Densenets                                                      | <a href="http://doi.org/10.1007/978-3-319-93000-8_93">http://doi.org/10.1007/978-3-319-93000-8_93</a>   | S, C | BF,FL    | T,CL   | Automated pixel-wise labeling of whole-slide images into normal tissue, benign lesion, in situ carcinoma and invasive carcinoma using a CNN model |
| 184 | Godinez WJ et al.        | A multi-scale convolutional neural network for phenotyping high-content cellular images                                               | <a href="http://doi.org/10.1093/bioinformatics/btx069">http://doi.org/10.1093/bioinformatics/btx069</a> | C    | FL       | CL     | Automated classification of cells into phenotypes using only the images' pixel intensity values for a multi-scale CNN classifier.                 |
| 185 | Goldsborough P et al.    | CytoGAN: Generative Modeling of Cell Images                                                                                           | <a href="https://doi.org/10.1101/227645">https://doi.org/10.1101/227645</a>                             | C    | FL       | CL     | Morphological profiling of human cultured cells in fluorescence microscopy images using GAN model.                                                |
| 186 | Goltsev Y et al.         | Deep profiling of mouse splenic architecture with CODEX multiplexed imaging.                                                          | <a href="https://doi.org/10.1101/203166">https://doi.org/10.1101/203166</a>                             | C    | FL       | CL,T   | Single-cell antigen quantification to overlay morphological features with lymphoid tissue characterization at cellular levels using a CNN model.  |
| 187 | Gopakumar G et al.       | Cytopathological image analysis using deep-learning networks in microfluidic microscopy                                               | <a href="http://doi.org/10.1364/JOSA-A.34.000111">http://doi.org/10.1364/JOSA-A.34.000111</a>           | C    | FL       | CL     | Cytopathologic analysis by classifying three unlabeled, unstained leukemia cell lines (K562, MOLT, and HL60) using a CNN classifier.              |
| 188 | Górriz M et al.          | Leishmaniasis parasite segmentation and classification using deep learning                                                            | <a href="http://doi.org/10.1007/978-3-319-94544-6_6">http://doi.org/10.1007/978-3-319-94544-6_6</a>     | S, C | BF       | CL,SCL | Automated segmentation of Leishmania parasites and classification into promastigotes, amastigotes, and adhered parasites using U-Net model.       |
| 189 | Gupta A et al.           | Convolutional neural networks for false positive reduction of automatically detected cilia in low magnification TEM images            | <a href="http://doi.org/10.1007/978-3-319-59126-1_34">http://doi.org/10.1007/978-3-319-59126-1_34</a>   | C    | EM       | SCL    | Improved detection of cilia using a CNN classifier for eliminating false-positives identified by a template matching method.                      |
| 190 | Güven G et al.           | Nanoparticle detection from TEM images with deep learning [GEM görüntülerinden derin öğrenme ile nanoparçacık tespiti]                | <a href="http://doi.org/10.1109/SIU.2018.8404468">http://doi.org/10.1109/SIU.2018.8404468</a>           | C    | EM       | T,SCL  | Automated detection of magnetite particles on TEM images using a CNN classifier.                                                                  |
| 191 | Haberl M et al.          | CDDeep3M - Plug-and-Play cloud based deep learning for image segmentation of light electron and X-ray microscopy                      | <a href="https://doi.org/10.1101/353425">https://doi.org/10.1101/353425</a>                             | S    | BF,FL,EM |        | A pre-configured publicly available cloud-based framework on Amazon Web Services for image segmentation using CNN model.                          |
| 192 | Haft-Javaherian M et al. | Deep convolutional neural networks for segmenting 3D in vivo multiphoton images of vasculature in Alzheimer disease mouse models      | <a href="http://arxiv.org/abs/1801.00880v2">http://arxiv.org/abs/1801.00880v2</a>                       | S    | FL       | T,CL   | Automated analysis of volumetric in vivo vessels image segmentation using a CNN model.                                                            |
| 193 | Hagita K et al.          | Super-resolution for asymmetric resolution of FIB-SEM 3D imaging using AI with deep learning                                          | <a href="http://doi.org/10.1038/s41598-018-24330-1">http://doi.org/10.1038/s41598-018-24330-1</a>       | P    | EM       | CL     | Super-resolution reconstruction of asymmetric 3D images to restore the depth resolution to achieve symmetric resolution using a CNN model.        |
| 194 | Hay EA et al.            | Performance of convolutional neural networks for identification of bacteria in 3D microscopy datasets                                 | <a href="https://doi.org/10.1101/273318">https://doi.org/10.1101/273318</a>                             | C    | FL       | CL     | Classification of bacteria and non-bacterial objects in larval zebrafish intestines light sheet fluorescence images using a 3D CNN classifier.    |
| 195 | Heinrich L et al.        | Deep learning for isotropic super-resolution from non-isotropic 3d electron microscopy                                                | <a href="http://doi.org/10.1007/978-3-319-66185-8_16">http://doi.org/10.1007/978-3-319-66185-8_16</a>   | P    | EM       | T,SCL  | Improved superresolution of 3D electron microscopy images using a CNN model.                                                                      |
| 196 | Hernández CX et al.      | Using Deep Learning for Segmentation and Counting within Microscopy Data                                                              | <a href="http://arxiv.org/abs/1802.10548v1">http://arxiv.org/abs/1802.10548v1</a>                       | S    | BF       | CL     | Improved identification of possible failure cases by incorporating uncertainty of a CNN classifier for U2OS cells.                                |
| 197 | Hershko* E et al.        | Multicolor localization microscopy by deep learning                                                                                   | <a href="http://arxiv.org/abs/1807.01637v1">http://arxiv.org/abs/1807.01637v1</a>                       | C, P | FL       | CL     | Automated designing of phase-modulating elements for improved color differentiation between species using CNN models.                             |
| 198 | Ho DJ et al.             | Nuclei detection and segmentation of fluorescence microscopy images using three dimensional convolutional neural networks             | <a href="http://doi.org/10.1109/ISBI.2018.8363606">http://doi.org/10.1109/ISBI.2018.8363606</a>         | S, C | FL       | CL     | Simultaneous detection and segmentation of cell nuclei in fluorescence microscopy images using a 3D CNN model.                                    |
| 199 | Holmström O et al.       | Point-of-care mobile digital microscopy and deep learning for the detection of soil-transmitted helminths and Schistosoma haematobium | <a href="http://doi.org/10.1080/16549716.2017.1337325">http://doi.org/10.1080/16549716.2017.1337325</a> | C    | BF       | CL     | Automated detection and classification of helminths in the mobile-phone microscopy images using CNN classifier.                                   |
| 200 | Hou L et al.             | Sparse Autoencoder for Unsupervised Nucleus Detection and Representation in Histopathology Images                                     | <a href="https://arxiv.org/abs/1704.00406v2">https://arxiv.org/abs/1704.00406v2</a>                     | C, S | BF       | T      | Unsupervised simultaneous nucleus detection and segmentation in histopathology tissue images using a sparse convolutional autoencoder.            |
| 201 | Hu C et al.              | Cerebral vessels segmentation for light-sheet microscopy image using convolutional neural networks                                    | <a href="http://doi.org/10.1117/12.2254714">http://doi.org/10.1117/12.2254714</a>                       | S    | FL       | O      | Automatic and robust segmentation of cerebral micro-vessels structures in mouse cerebrovascular light-sheet microscopy images using a CNN model.  |

|     |                            |                                                                                                                                                                                                     |                                                                                                       |      |        |       |                                                                                                                                                      |
|-----|----------------------------|-----------------------------------------------------------------------------------------------------------------------------------------------------------------------------------------------------|-------------------------------------------------------------------------------------------------------|------|--------|-------|------------------------------------------------------------------------------------------------------------------------------------------------------|
| 202 | Huang GB et al.            | Deep and Wide Multiscale Recursive Networks for Robust Image Labeling                                                                                                                               | <a href="http://arxiv.org/abs/1310.0354v3">http://arxiv.org/abs/1310.0354v3</a>                       | C, P | EM     | T,SCL | Improved image labeling performance for connectomic reconstruction of neural circuitry from 3d EM data using a multiscale recursive CNN model.       |
| 203 | Huttunen MJ et al.         | Automated classification of multiphoton microscopy images of ovarian tissue using deep learning                                                                                                     | <a href="http://doi.org/10.1117/1.JBO.23.6.066002">http://doi.org/10.1117/1.JBO.23.6.066002</a>       | C    | FL     | T     | Robust classification of unstained, reproductive tissues in multiphoton microscopy images using CNN classifiers.                                     |
| 204 | Ishikawa Y et al.          | Brain tumor classification of microscopy images using deep residual learning                                                                                                                        | <a href="http://doi.org/10.1117/12.2242711">http://doi.org/10.1117/12.2242711</a>                     | C    | BF     | CL    | Improved segmentation of cell regions from astrocytes and classification of brain tumors using CNN models.                                           |
| 205 | Işıl Ç et al.              | Resolution enhancement of wide-field interferometric microscopy by coupled deep autoencoders                                                                                                        | <a href="http://doi.org/10.1364/AO.57.002545">http://doi.org/10.1364/AO.57.002545</a>                 | P    | BF     | SCL   | Improved resolution of L-shaped nanostructures images using a coupled autoencoders.                                                                  |
| 206 | Ito E et al.               | Virus Particle Detection by Convolutional Neural Network in Transmission Electron Microscopy Images                                                                                                 | <a href="http://doi.org/10.1007/s12560-018-9335-7">http://doi.org/10.1007/s12560-018-9335-7</a>       | C    | EM     | SCL   | Automated localization of virus particles in TEM images using the probability maps generated by a CNN model.                                         |
| 207 | Januszewski M et al.       | High-precision automated reconstruction of neurons with flood-filling networks                                                                                                                      | <a href="http://doi.org/10.1038/s41592-018-0049-4">http://doi.org/10.1038/s41592-018-0049-4</a>       | P, S | EM     | SCL   | Automated tracing of neurons in a dataset obtained by serial block-face electron microscopy of a zebra finch brain using flood-filling CNN model.    |
| 208 | Jiang B et al.             | Convolutional neural networks in automatic recognition of trans-differentiated neural progenitor cells under bright-field microscopy                                                                | <a href="http://doi.org/10.1109/IMCC C.2015.33">http://doi.org/10.1109/IMCC C.2015.33</a>             | C    | BF     | CL    | Automated pre-processing and classification of neural progenitor cells and non-neural progenitor cells using a novel CNN-based recognition system.   |
| 209 | Jiang S et al.             | Transform- and multi-domain deep learning for single-frame rapid autofocusing in whole slide imaging                                                                                                | <a href="http://doi.org/10.1364/BOE.9.001601">http://doi.org/10.1364/BOE.9.001601</a>                 | P    | BF     | T     | Focal position prediction using a CNN for improved autofocusing performance under incoherent Kohler illumination, partially coherent illumination.   |
| 210 | Jimenez-Carretero D et al. | Tox_(R)CNN: Deep Learning-Based Nuclei Profiling tool For Drug Toxicity Screening                                                                                                                   | <a href="https://doi.org/10.1101/334557">https://doi.org/10.1101/334557</a>                           | C    | FL     | CL    | Toxicity prediction from images of pre-treated DAPI-stained cells using a CNN classifier.                                                            |
| 211 | Jo Y et al.                | Holographic deep learning for rapid optical screening of anthrax spores                                                                                                                             | <a href="http://doi.org/10.1126/sciad.v.1700606">http://doi.org/10.1126/sciad.v.1700606</a>           | C    | BF     | CL    | Diagnosis of Listeria monocytogenes by classifying living cells using a CNN classifier for the label-free screening in holographic microscopy images |
| 212 | Judd N et al.              | A pilot study for distinguishing chromophobe renal cell carcinoma and oncocytoma using second harmonic generation imaging and convolutional neural network analysis of collagen fibrillar structure | <a href="http://doi.org/10.1117/12.2288088">http://doi.org/10.1117/12.2288088</a>                     | C    | BF     | T     | Classification of kidney tumor tissue images acquired with collagen matrix using a CNN classifier to distinguish collagen structure-based entities.  |
| 213 | Kandaswamy C et al.        | High-Content Analysis of Breast Cancer Using Single-Cell Deep Transfer Learning                                                                                                                     | <a href="https://doi.org/10.1177/1087057115623451">https://doi.org/10.1177/1087057115623451</a>       | C    | FL     | CL    | Classification of compounds in the chemical mechanisms of action for identifying cell phenotype affecting substances using a CNN classifier.         |
| 214 | Kannan S et al.            | Segmentation of Glomeruli Within Trichrome Images Using Deep Learning                                                                                                                               | <a href="https://doi.org/10.1101/345579">https://doi.org/10.1101/345579</a>                           | C, S | BF     | T     | Automated detection and segmentation of the glomeruli within digitized kidney biopsy images using a CNN.                                             |
| 215 | Kassim YM et al.           | Microvasculature segmentation of arterioles using deep CNN                                                                                                                                          | <a href="http://doi.org/10.1109/ICIP.2017.8296347">http://doi.org/10.1109/ICIP.2017.8296347</a>       | S    | FL     | T     | Robust segmentations of microvasculature tissues from epifluorescence microscopy imagery of mice dura mater using a CNN framework.                   |
| 216 | Kaur P et al.              | Hybrid deep learning for Reflectance Confocal Microscopy skin images                                                                                                                                | <a href="http://doi.org/10.1109/ICPR.2016.7899844">http://doi.org/10.1109/ICPR.2016.7899844</a>       | C    | FL     | T     | Identifying human skin disorders in confocal microscopy images of tissues using texon-based feature vectors as input for a CNN.                      |
| 217 | Khan A et al.              | Deep convolutional neural networks for human embryonic cell counting                                                                                                                                | <a href="http://doi.org/10.1007/978-3-319-46604-0_25">http://doi.org/10.1007/978-3-319-46604-0_25</a> | C    | BF     | CL    | Automated cell counting in time-lapse microscopy images of developing human embryos using a CNN classifier.                                          |
| 218 | Khobragade N et al.        | Multi-class segmentation of neuronal electron microscopy images using deep learning                                                                                                                 | <a href="http://doi.org/10.1117/12.2293940">http://doi.org/10.1117/12.2293940</a>                     | S    | EM     | CL    | Multi-class segmentation of Drosophila third instar larva ventral nerve cord images using a pixel-wise Bayesian SegNet classifier.                   |
| 219 | Khoshdeli M et al.         | Feature-Based Representation Improves Color Decomposition and Nuclear Detection Using a Convolutional Neural Network                                                                                | <a href="http://doi.org/10.1109/TBME.2017.2711529">http://doi.org/10.1109/TBME.2017.2711529</a>       | C    | FL, BF | CL    | Improved color decomposition (CD) and subsequent nuclear detection in multiple imaging modalities using a CNN classifier.                            |
| 220 | Khosravi P et al.          | Deep Convolutional Neural Networks Enable Discrimination of Heterogeneous Digital Pathology Images                                                                                                  | <a href="https://doi.org/10.1101/197517">https://doi.org/10.1101/197517</a>                           | C    | FL, BF | T     | Classification of different histopathology images across different cancer subtypes by fine-tuning pre-trained CNN's.                                 |
| 221 | Klibisz A et al.           | Fast, simple calcium imaging segmentation with fully convolutional networks                                                                                                                         | <a href="http://doi.org/10.1007/978-3-319-67558-9_33">http://doi.org/10.1007/978-3-319-67558-9_33</a> | S    | FL     | CL    | Examine neuron activity as a series of images by segmenting fluorescence microscopy time-lapse images using a U-Net architecture.                    |

|     |                          |                                                                                                                                                 |                                                                                                             |      |    |      |                                                                                                                                                     |
|-----|--------------------------|-------------------------------------------------------------------------------------------------------------------------------------------------|-------------------------------------------------------------------------------------------------------------|------|----|------|-----------------------------------------------------------------------------------------------------------------------------------------------------|
| 222 | Kose K et al.            | A multiresolution deep learning framework for automated annotation of reflectance confocal microscopy images                                    | <a href="http://doi.org/10.1364/MICROSCOPY.2018.MTh2A.1">http://doi.org/10.1364/MICROSCOPY.2018.MTh2A.1</a> | P    | FL | CL   | Automated annotation of morphological patterns to aid skin cancer diagnosis using a multiresolution nested convolutional autoencoder.               |
| 223 | Kraus Z et al.           | Classifying and segmenting microscopy images with deep multiple instance learning                                                               | <a href="http://doi.org/10.1093/bioinformatics/btw252">http://doi.org/10.1093/bioinformatics/btw252</a>     | C, S | FL | CL   | Classification and segmentation of mammalian and yeast cells using only microscopy image annotations for multiple instance learning of CNN.         |
| 224 | Kwak JT et al.           | Nuclear Architecture Analysis of Prostate Cancer via Convolutional Neural Networks                                                              | <a href="http://doi.org/10.1109/ACCESS.2017.2747838">http://doi.org/10.1109/ACCESS.2017.2747838</a>         | C    | BF | T    | Improved prostate cancer diagnosis by identifying epithelial nuclear seeds in prostate tissue specimen samples using a CNN classifier.              |
| 225 | Kwok S et al.            | Multiclass Classification of Breast Cancer in Whole-Slide Images                                                                                | <a href="http://doi.org/10.1007/978-3-319-93000-8_106">http://doi.org/10.1007/978-3-319-93000-8_106</a>     | C    | BF | T    | Improved breast cancer tissue diagnosis by classifying HE stained WSI images through a patch-based CNN classifier.                                  |
| 226 | Laine RF et al.          | Structured illumination microscopy combined with machine learning enables the high throughput analysis and classification of virus structure    | <a href="https://doi.org/10.1101/266551">https://doi.org/10.1101/266551</a>                                 | C    | BF | CL   | Fast quality assessment of oncolytic virotherapy and vaccine development for high throughput viral production using a pre-trained CNN classifier.   |
| 227 | Lee G-G et al.           | Stem cell detection based on Convolutional Neural Network via third harmonic generation microscopy images                                       | <a href="http://doi.org/10.1109/ICOT.2017.8336085">http://doi.org/10.1109/ICOT.2017.8336085</a>             | C    | BF | CL,T | Improved tissue diagnosis by classifying basal cells and stem cells using a CNN classifier to detect stem cells in the stratum basale.              |
| 228 | Leena Silvester M et al. | Enhanced CNN based electron microscopy image segmentation                                                                                       | <a href="http://doi.org/10.2478/cait-2012-0014">http://doi.org/10.2478/cait-2012-0014</a>                   | S    | EM | T    | Improved segmentation of ventral nerve cord in EM images using perceptual grouping via a graph cut and its combinations with CNN.                   |
| 229 | Li H et al.              | A Hierarchical Convolutional Neural Network for vesicle fusion event classification                                                             | <a href="http://doi.org/10.1016/j.compmedig.2017.04.003">http://doi.org/10.1016/j.compmedig.2017.04.003</a> | C    | FL | CL   | Automated classification and tracking of vesicle fusion events in fluorescence microscopy image sequences using a novel hierarchical CNN.           |
| 230 | Li Hen et al.            | Cell Dynamic Morphology Classification Using Deep Convolutional Neural Networks                                                                 | <a href="https://doi.org/10.1002/cyto.a.23490">https://doi.org/10.1002/cyto.a.23490</a>                     | C    | BF | CL   | Mouse lymphocytes cell dynamic morphology classification using a CNN classifier                                                                     |
| 231 | Li R et al.              | Deep Learning Segmentation of Optical Microscopy Images Improves 3-D Neuron Reconstruction                                                      | <a href="http://doi.org/10.1109/TMI.2017.2679713">http://doi.org/10.1109/TMI.2017.2679713</a>               | S    | BF | CL   | Improved voxel-wise segmentation of volumetric neuronal microscopy images using a novel 3D CNN.                                                     |
| 232 | Li Y et al.              | DLBI: Deep learning guided Bayesian inference for structure reconstruction of super-resolution fluorescence microscopy                          | <a href="http://doi.org/10.1093/bioinformatics/bty241">http://doi.org/10.1093/bioinformatics/bty241</a>     | P    | FL | SB   | Time-series analysis and visualization of subcellular structures using a bayesian multi-scale CNN.                                                  |
| 233 | Liang L et al.           | A deep learning approach to estimate chemically-treated collagenous tissue nonlinear anisotropic stress-strain responses from microscopy images | <a href="http://doi.org/10.1016/j.actbio.2017.09.025">http://doi.org/10.1016/j.actbio.2017.09.025</a>       | C    | FL | T    | GLBP tissue elastic properties prediction in non-invasive second harmonic generation (SHG) images of collagen networks using CNN classifier.        |
| 234 | Liu K et al.             | Fast 3D cell tracking with wide-field fluorescence microscopy through deep learning                                                             | <a href="http://arxiv.org/abs/1805.05139v2">http://arxiv.org/abs/1805.05139v2</a>                           | C    | FL | CL   | Prediction of 3D locations from a single 2D fluorescence microscopy image by cascading two CNN's for in vivo 3D tracking of multiple blood cells.   |
| 235 | López YP et al.          | Automatic classification of light field smear microscopy patches using Convolutional Neural Networks for identifying Mycobacterium Tuberculosis | <a href="http://doi.org/10.1109/DISTR.A.2017.8229512">http://doi.org/10.1109/DISTR.A.2017.8229512</a>       | C    | BF | CL   | Identification of Mycobacterium tuberculosis by classifying light field smear microscopy images using augmented input patches for a CNN classifier. |
| 236 | Lu A et al.              | Learning unsupervised feature representations for single cell microscopy images with paired cell inpainting                                     | <a href="https://doi.org/10.1101/395954">https://doi.org/10.1101/395954</a>                                 | C    | FL | CL   | Improved phenotypic classification for both yeast and human cells using an unsupervised CNN classifier.                                             |
| 237 | Maitin-Shepard J et al.  | Combinatorial Energy Learning for Image Segmentation                                                                                            | <a href="http://arxiv.org/abs/1506.04304v3">http://arxiv.org/abs/1506.04304v3</a>                           | S    | EM | T    | Segmentation of neuropil tissues using a CNN to model the conditional energy of a segmentation output.                                              |
| 238 | Marsh JN et al.          | Deep Learning Global Glomerulosclerosis in Transplant Kidney Frozen Sections                                                                    | <a href="https://doi.org/10.1101/292789">https://doi.org/10.1101/292789</a>                                 | C    | BF | T,CL | Automated identification and classification of glomeruli in frozen donor kidney section biopsies whole-slide images using a CNN model               |
| 239 | Matuszewski DJ et al.    | Minimal annotation training for segmentation of microscopy images                                                                               | <a href="http://doi.org/10.1109/ISBI.2018.8363599">http://doi.org/10.1109/ISBI.2018.8363599</a>             | S    | EM | CL   | Improved segmentation of viruses in EM images with minimal annotation using a U-Net model.                                                          |
| 240 | Mesbah R et al.          | Deep convolutional encoder-decoder for myelin and axon segmentation                                                                             | <a href="http://doi.org/10.1109/IVCNZ.2016.7804455">http://doi.org/10.1109/IVCNZ.2016.7804455</a>           | S    | BF | SB   | Automated segmentation of myelin and axon from mouse spinal cord microscopy images using CNN and Convolutional autoencoder.                         |
| 241 | Mishra M et al.          | Structure-based assessment of cancerous mitochondria using deep networks                                                                        | <a href="http://doi.org/10.1109/ISBI.2016.7493327">http://doi.org/10.1109/ISBI.2016.7493327</a>             | C    | EM | SB   | Automated quantitative assessment of mitochondria structures isolated from liver tumor cell lines using a CNN classifier.                           |
| 242 | Murthy V et al.          | Center-Focusing Multi-task {CNN} with Injected Features for Classification of Glioma Nuclear Images                                             | <a href="https://doi.org/10.1109%2Fwacv.2017.98">https://doi.org/10.1109%2Fwacv.2017.98</a>                 | C    | BF | CL   | Automated shapes and attributes classification of a glioma cell nucleus using a CNN classifier.                                                     |



|     |                    |                                                                                                                                          |                                                                                                           |   |        |       |                                                                                                                                                |
|-----|--------------------|------------------------------------------------------------------------------------------------------------------------------------------|-----------------------------------------------------------------------------------------------------------|---|--------|-------|------------------------------------------------------------------------------------------------------------------------------------------------|
| 243 | Naito T et al.     | Identification and segmentation of myelinated nerve fibers in a cross-sectional optical microscopic image using a deep learning model    | <a href="http://doi.org/10.1016/j.jneumeth.2017.08.014">http://doi.org/10.1016/j.jneumeth.2017.08.014</a> | S | BF     | T     | Automated nerve fiber identification and segmentation using CNN model.                                                                         |
| 244 | Nanni L et al.     | Bioimage Classification with Handcrafted and Learned Features                                                                            | <a href="http://doi.org/10.1109/TCBB.2018.2821127">http://doi.org/10.1109/TCBB.2018.2821127</a>           | C | BF,FL  | CL,SB | Generic bioimage classification method for a wide range of cell and subcellular classification problems using a CNN model.                     |
| 245 | Nazeri K et al.    | Two-Stage Convolutional Neural Network for Breast Cancer Histology Image Classification                                                  | <a href="http://doi.org/10.1007/978-3-319-93000-8_81">http://doi.org/10.1007/978-3-319-93000-8_81</a>     | C | BF     | T     | Automated detection and classification of breast tissue in microscopy images using multiple patch-based CNN classifiers.                       |
| 246 | Nguyen T et al.    | A deep-learning approach for high-speed Fourier ptychographic microscopy                                                                 | <a href="http://doi.org/10.1364/3D.2018.JTh3A.6">http://doi.org/10.1364/3D.2018.JTh3A.6</a>               | P | BF     | CL    | Automated reconstruction of dynamic live cells video sequence captured using a computational microscopy technique using a CNN model.           |
| 247 | Nguyen T et al.    | Deep learning bi-telecentric digital holographic microscopy for aberration compensation applied to cancer cells                          | <a href="http://doi.org/10.1364/DH.2017.Tu2A.5">http://doi.org/10.1364/DH.2017.Tu2A.5</a>                 | P | BF     | CL    | Automated background area detection for residual phase aberration compensation using a CNN model.                                              |
| 248 | Nie W-Z et al.     | 3D Convolutional Networks-Based Mitotic Event Detection in Time-Lapse Phase Contrast Microscopy Image Sequences of Stem Cell Populations | <a href="http://doi.org/10.1109/CVPRW.2016.171">http://doi.org/10.1109/CVPRW.2016.171</a>                 | C | BF     | CL    | Automated mitotic event detection of stem cell populations in time-lapse phase contrast microscopy images using a CNN classifier.              |
| 249 | Nioka H et al.     | Classification of C2C12 cells at differentiation by convolutional neural network of deep learning using phase contrast images            | <a href="http://doi.org/10.1007/s13577-017-0191-9">http://doi.org/10.1007/s13577-017-0191-9</a>           | C | BF     | CL    | Automated cellular differentiation recognition of myogenic C2C12 cell line with phase contrast microscopy using a CNN classifier.              |
| 250 | Nishimoto S et al. | Predicting the future direction of cell movement with convolutional neural networks                                                      | <a href="https://doi.org/10.1101/388033">https://doi.org/10.1101/388033</a>                               | C | BF     | CL    | Automated cell migration prediction from a single image patch of a cell at a particular time using multiple CNN's.                             |
| 251 | Nyawira I et al.   | Understanding neural pathways in zebrafish through deep learning and high resolution electron microscope data                            | <a href="http://doi.org/10.1145/3219104.3229285">http://doi.org/10.1145/3219104.3229285</a>               | S | EM     | SB    | Automated segmentation of high-resolution scanning electron microscope (SEM) image data using a CNN model.                                     |
| 252 | Ounkomol C et al.  | Three dimensional cross-modal image inference: label-free methods for subcellular structure prediction                                   | <a href="https://doi.org/10.1101/216606">https://doi.org/10.1101/216606</a>                               | C | FL, BF | SB    | Automated prediction of fluorescently labeled structures in live cells solely from 3D brightfield microscopy images using CNN classifier.      |
| 253 | Ounkomol C et al.  | Label-free prediction of three-dimensional fluorescence images from transmitted light microscopy                                         | <a href="https://doi.org/10.1101/289504">https://doi.org/10.1101/289504</a>                               | C | FL     | CL    | Prediction of 3D fluorescence directly from transmitted light images using a CNN classifier for generating multi-structure, integrated images. |
| 254 | Oztel I et al.     | Mitochondria segmentation in electron microscopy volumes using deep convolutional neural network                                         | <a href="http://doi.org/10.1109/BIBM.2017.8217827">http://doi.org/10.1109/BIBM.2017.8217827</a>           | S | EM     | SB    | Automated segmentation of mitochondria in the CA1 hippocampus region of brain tissue from electron microscopy images using CNN model.          |
| 255 | Öztürk Ş et al.    | A convolutional neural network model for semantic segmentation of mitotic events in microscopy images                                    | <a href="http://doi.org/10.1007/s00521-017-3333-9">http://doi.org/10.1007/s00521-017-3333-9</a>           | S | BF, EM | CL    | Improved mitosis segmentation using CNN model for Semantic segmentation.                                                                       |
| 256 | Pahariya G et al.  | High precision automated detection of labeled nuclei in terabyte-scale whole-brain volumetric image data of mouse                        | <a href="https://doi.org/10.1101/252247">https://doi.org/10.1101/252247</a>                               | C | FL     | CL    | Automated mitosis detection by aggregating data using CNN via additional crowdsourcing layer (AggNet).                                         |
| 257 | Pan X et al.       | Cell detection in pathology and microscopy images with multi-scale fully convolutional neural networks                                   | <a href="http://doi.org/10.1007/s11280-017-0520-7">http://doi.org/10.1007/s11280-017-0520-7</a>           | C | BF,FL  | CL    | Automated density map regression to robustly detect the nuclei in pathology and microscopy images using a novel multi-scale CNN classifier.    |
| 258 | Panicker RO et al. | Automatic detection of tuberculosis bacilli from microscopic sputum smear images using deep learning methods                             | <a href="http://doi.org/10.1016/j.bbe.2018.05.007">http://doi.org/10.1016/j.bbe.2018.05.007</a>           | C | BF     | CL    | Automated detection of tuberculosis (TB) bacilli from microscopic sputum smear images using a CNN classifier.                                  |
| 259 | Penas KED et al.   | Malaria Parasite Detection and Species Identification on Thin Blood Smears Using a Convolutional Neural Network                          | <a href="http://doi.org/10.1109/CHAS E.2017.51">http://doi.org/10.1109/CHAS E.2017.51</a>                 | C | BF     | SB    | Automated detection of malaria parasites in thin blood smears images using a CNN classifier.                                                   |
| 260 | Pitkäaho T et al.  | Performance of autofocus capability of deep convolutional neural networks in digital holographic microscopy                              | <a href="http://doi.org/10.1364/DH.2017.W2A.5">http://doi.org/10.1364/DH.2017.W2A.5</a>                   | P | BF     | CL    | Automated focusing of digital holograms of microscopic objects using a CNN model.                                                              |
| 261 | Qiao H et al.      | GPU-based deep convolutional neural network for tomographic phase microscopy with $\ell_1$ fitting and regularization                    | <a href="http://doi.org/10.1117/1.JBO.23.6.066003">http://doi.org/10.1117/1.JBO.23.6.066003</a>           | P | O      | CL    | Improve the performance of phase tomography using a CNN model.                                                                                 |

|     |                       |                                                                                                                                                                           |                                                                                                       |   |        |        |                                                                                                                                                   |
|-----|-----------------------|---------------------------------------------------------------------------------------------------------------------------------------------------------------------------|-------------------------------------------------------------------------------------------------------|---|--------|--------|---------------------------------------------------------------------------------------------------------------------------------------------------|
| 262 | Qiu Y et al.          | Applying deep learning technology to automatically identify metaphase chromosomes using scanning microscopic images: An initial investigation                             | <a href="http://doi.org/10.1117/12.2217418">http://doi.org/10.1117/12.2217418</a>                     | C | FL     | SB     | Identification of chromosomes metaphase sub-cellular structures using a CNN classifier.                                                           |
| 263 | Quan TM et al.        | FusionNet: A deep fully residual convolutional neural network for image segmentation in connectomics                                                                      | <a href="http://arxiv.org/abs/1612.05360v2">http://arxiv.org/abs/1612.05360v2</a>                     | S | EM     | T,CL   | Automated segmentation of neuronal structures in connectomics data using a CNN model.                                                             |
| 264 | Quay M et al.         | Designing deep neural networks to automate segmentation for serial block-face electron microscopy                                                                         | <a href="http://doi.org/10.1109/ISBI.2018.8363603">http://doi.org/10.1109/ISBI.2018.8363603</a>       | S | EM     | CL,SB  | Automated segmentation of a human platelet tissue sample in serial block-face electron microscopy images using an ensemble of CNN model.          |
| 265 | Quinn JA et al.       | Deep Convolutional Neural Networks for Microscopy-Based Point of Care Diagnostics                                                                                         | <a href="http://arxiv.org/abs/1608.02989v1">http://arxiv.org/abs/1608.02989v1</a>                     | C | BF     | CL     | Automated diagnosis of malaria in thick blood smears, tuberculosis in sputum samples, and intestinal parasite eggs using a CNN model.             |
| 266 | Rajasekaran K et al.  | An accurate perception method for low contrast bright field microscopy in heterogeneous microenvironments                                                                 | <a href="http://doi.org/10.3390/app7121327">http://doi.org/10.3390/app7121327</a>                     | C | BF     | SB     | Automated perceiving of shapes for optical tweezers-based robotic manipulation using a CNN classifier.                                            |
| 267 | Rakhlin A et al.      | Deep Convolutional Neural Networks for Breast Cancer Histology Image Analysis                                                                                             | <a href="http://doi.org/10.1007/978-3-319-93000-8_83">http://doi.org/10.1007/978-3-319-93000-8_83</a> | C | BF     | T      | Automated classification of breast cancer tissues in histology images using a CNN classifier.                                                     |
| 268 | Rao Q et al.          | Automatically segmenting and reconstructing neurons in SEM images                                                                                                         | <a href="http://doi.org/10.1109/ICMA.2016.7558857">http://doi.org/10.1109/ICMA.2016.7558857</a>       | S | EM     | CL     | Neuronal boundary detection and segmentation using membrane detection probability map (MDPM) generated by a CNN model.                            |
| 269 | Rao Q et al.          | Deep learning and shapes similarity for joint segmentation and tracing single neurons in SEM images                                                                       | <a href="http://doi.org/10.1117/12.2254284">http://doi.org/10.1117/12.2254284</a>                     | S | EM     | CL     | Automated neuronal membranes detection from Tape-collecting Ultra Microtome Scanning Electron Microscopy (ATUM-SEM) using a CNN model.            |
| 270 | Ravi D et al.         | Effective deep learning training for single-image super-resolution in endomicroscopy exploiting video-registration-based reconstruction                                   | <a href="http://doi.org/10.1007/s11548-018-1764-0">http://doi.org/10.1007/s11548-018-1764-0</a>       | P | FL     | CL     | Improved image superresolution reconstruction using a novel synthetic data generation approach to train the exemplar-based CNN model.             |
| 271 | Raza SEA et al.       | Micro-Net: A unified model for segmentation of various objects in microscopy images                                                                                       | <a href="http://arxiv.org/abs/1804.08145v1">http://arxiv.org/abs/1804.08145v1</a>                     | S | FL, BF | CL, SB | Automated segmentation of cells, nuclei, and glands in fluorescence microscopy and histology images using a multi-resolution CNN model.           |
| 272 | Raza SEA et al.       | MIMO-Net: A multi-input multi-output convolutional neural network for cell segmentation in fluorescence microscopy images                                                 | <a href="http://doi.org/10.1109/ISBI.2017.7950532">http://doi.org/10.1109/ISBI.2017.7950532</a>       | S | FL     | CL     | Automated cell segmentation in fluorescence microscopy images using multiple-input-multiple-output CNN model.                                     |
| 273 | Rempfler M et al.     | Tracing cell lineages in videos of lens-free microscopy                                                                                                                   | <a href="http://doi.org/10.1016/j.media.2018.05.009">http://doi.org/10.1016/j.media.2018.05.009</a>   | C | BF     | CL     | Automated detection and tracking of cells in LFM images using a CNN model and probabilistic model based on moral lineage tracing.                 |
| 274 | Ren J et al.          | Adversarial Domain Adaptation for Classification of Prostate Histopathology Whole-Slide Images                                                                            | <a href="https://arxiv.org/abs/1806.01357">https://arxiv.org/abs/1806.01357</a>                       | C | BF     | T      | Improved classification for automated Gleason grading of prostate histopathology tissue Whole-Slide Images using adversarial domain adaptation.   |
| 275 | Rezaeilouyeh H et al. | Microscopic medical image classification framework via deep learning and shearlet transform                                                                               | <a href="http://doi.org/10.1117/1.JMI.3.4.044501">http://doi.org/10.1117/1.JMI.3.4.044501</a>         | C | BF     | T      | Automated cancer tissue diagnosis using magnitude and phase of shearlet coefficients as additional input for a CNN classifier.                    |
| 276 | Rivenson Y et al.     | Phase recovery and holographic image reconstruction using deep learning in neural networks                                                                                | <a href="https://doi.org/10.1038/lsa.2017.141">https://doi.org/10.1038/lsa.2017.141</a>               | P | BF     | T      | Improved phase retrieval and holographic image reconstruction of blood, Pap smears, and tissue sections using a cascaded multi-scale CNN model.   |
| 277 | Rivenson Y et al.     | Toward a Thinking Microscope: Deep Learning in Optical Microscopy and Image Reconstruction                                                                                | <a href="http://arxiv.org/abs/1805.08970v1">http://arxiv.org/abs/1805.08970v1</a>                     | P | BF     | T      | Automated microscopic image reconstruction of lung, kidney, and breast tissue sections using a CNN model.                                         |
| 278 | Rivenson Y et al.     | PhaseStain: Digital staining of label-free quantitative phase microscopy images using deep learning                                                                       | <a href="http://arxiv.org/abs/1807.07701v1">http://arxiv.org/abs/1807.07701v1</a>                     | P | BF     | T      | Virtual staining for brightfield microscopy images of skin, kidney, and liver tissue sections using a generative adversarial network (GAN) model. |
| 279 | Robitaille L et al.   | Learning to Become an Expert: Deep Networks Applied To Super-Resolution Microscopy                                                                                        | <a href="http://arxiv.org/abs/1803.10806v1">http://arxiv.org/abs/1803.10806v1</a>                     | P | STED   | T      | An automated quantitative quality measure of neuronal structures in super-resolution microscopy images using a CNN model.                         |
| 280 | Roels J et al.        | Convolutional neural network pruning to accelerate membrane segmentation in electron microscopy                                                                           | <a href="http://doi.org/10.1109/ISBI.2017.7950600">http://doi.org/10.1109/ISBI.2017.7950600</a>       | S | EM     | SB     | Improved membrane segmentation of mitochondria and endoplasmic reticula by optimizing a CNN model.                                                |
| 281 | Romo-Bucheli D et al. | A deep learning based strategy for identifying and associating mitotic activity with gene expression derived risk categories in estrogen receptor positive breast cancers | <a href="https://doi.org/10.1002/cyto.a.23065">https://doi.org/10.1002/cyto.a.23065</a>               | C | BF     | T      | Improved mitotic figures identification from breast cancer tissue whole slides images using a CNN classifier.                                     |
| 282 | Sabbaghi S et al.     | A deep bag-of-features model for the classification of melanomas in dermoscopy images                                                                                     | <a href="http://doi.org/10.1109/EMBC.2016.7590962">http://doi.org/10.1109/EMBC.2016.7590962</a>       | C | BF     | CL     | Classification of cancer and non-cancer skin regions using a stacked sparse auto-encoder with SIFT and color descriptors.                         |

|     |                           |                                                                                                                                                               |                                                                                                       |     |    |    |                                                                                                                                                    |
|-----|---------------------------|---------------------------------------------------------------------------------------------------------------------------------------------------------------|-------------------------------------------------------------------------------------------------------|-----|----|----|----------------------------------------------------------------------------------------------------------------------------------------------------|
| 283 | Sailem H et al.           | Discovery of Rare Phenotypes in Cellular Images Using Weakly Supervised Deep Learning                                                                         | <a href="http://doi.org/10.1109/ICCVW.2017.13">http://doi.org/10.1109/ICCVW.2017.13</a>               | P   | FL | CL | Automated labeling of genetically weak perturbed cells phenotypes using a weakly supervised CNN to identify rare events location.                  |
| 284 | Saponaro P et al.         | DeepXScope: Segmenting Microscopy Images with a Deep Neural Network                                                                                           | <a href="http://doi.org/10.1109/CVPRW.2017.117">http://doi.org/10.1109/CVPRW.2017.117</a>             | S   | FL | T  | Automated segmenting of the fungal pathogen and cell boundaries and stomata of the host plant tissues using a CNN model.                           |
| 285 | Schaumberg AJ et al.      | DeepScope: Nonintrusive Whole Slide Saliency Annotation and Prediction from Pathologists at the Microscope                                                    | <a href="https://doi.org/10.1101/097246">https://doi.org/10.1101/097246</a>                           | C   | BF | T  | Creation of whole-slide image saliency maps to facilitate manual annotation process using a pre-trained CNN classifier.                            |
| 286 | Schaumberg AJ et al.      | H&E-stained Whole Slide Image Deep Learning Predicts SPOP Mutation State in Prostate Cancer                                                                   | <a href="https://doi.org/10.1101/064279">https://doi.org/10.1101/064279</a>                           | C   | BF | T  | Prediction of a genetic mutation (SPOP) in whole slide images of prostate cancer tissues using a CNN classifier.                                   |
| 287 | Schaumberg AJ et al.      | Large-Scale Annotation of Histopathology Images from Social Media                                                                                             | <a href="https://doi.org/10.1101/396663">https://doi.org/10.1101/396663</a>                           | C   | BF | T  | Classification of several tissue types from a dataset created from images shared by pathologists on twitter using pre-trained CNN classifiers.     |
| 288 | Schubert P et al.         | Learning cellular morphology with neural networks                                                                                                             | <a href="https://doi.org/10.1101/364034">https://doi.org/10.1101/364034</a>                           | S   | EM | SB | Automated reconstruction and detection of cellular fragments in volumetric brain tissue images by multi-view CNN model.                            |
| 289 | Shahbazi A et al.         | Flexible Learning-Free Segmentation and Reconstruction for Sparse Neuronal Circuit Tracing                                                                    | <a href="https://doi.org/10.1101/278515">https://doi.org/10.1101/278515</a>                           | S   | EM | CL | Creation of a learning-free method for sparse segmentation and reconstruction of neural volumes using a CNN model.                                 |
| 290 | Sheikhzadeh F et al.      | Automatic labeling of molecular biomarkers of immunohistochemistry images using fully convolutional networks                                                  | <a href="http://doi.org/10.1371/journal.pone.0190783">http://doi.org/10.1371/journal.pone.0190783</a> | C   | BF | T  | Automated detection and classification of molecular biomarkers of tissues using a CNN classifier.                                                  |
| 291 | Shen W et al.             | Multi-stage Multi-recursive-input Fully Convolutional Networks for Neuronal Boundary Detection                                                                | <a href="http://arxiv.org/abs/1703.08493v2">http://arxiv.org/abs/1703.08493v2</a>                     | S   | EM | T  | Identification of cortical connectivity by improved mouse piriform cortex image segmentation using a multi-stage multi-recursive CNN model.        |
| 292 | Shkolyar A et al.         | Automatic detection of cell divisions (mitosis) in live-imaging microscopy images using Convolutional Neural Networks                                         | <a href="http://doi.org/10.1109/EMBC.2015.7318469">http://doi.org/10.1109/EMBC.2015.7318469</a>       | C   | BF | CL | Semi-automated workflow for cell divisions detection in live-imaging microscopy by classifying mitosis candidates using a CNN classifier.          |
| 293 | Sibley AR et al.          | Simultaneous segmentation and classification of multichannel immuno-fluorescently labeled confocal microscopy images using deep convolutional neural networks | <a href="http://doi.org/10.1117/12.2292934">http://doi.org/10.1117/12.2292934</a>                     | S,C | FL | T  | Automated segmentation and classification of dendritic cell types for application to cell membrane immunofluorescent stains using a CNN model.     |
| 294 | Singh SP et al.           | Machine learning based classification of cells into chronological stages using single-cell transcriptomics.                                                   | <a href="https://doi.org/10.1101/303214">https://doi.org/10.1101/303214</a>                           | C   | FL | CL | Detection of premature aging in cells using a CNN classifier to provide a window for preventive therapies against age-related diseases.            |
| 295 | Sirinukunwattana K et al. | Locality Sensitive Deep Learning for Detection and Classification of Nuclei in Routine Colon Cancer Histology Images                                          | <a href="https://doi.org/10.1109/tmi.2016.2525803">https://doi.org/10.1109/tmi.2016.2525803</a>       | C   | BF | T  | Per-pixel likelihood prediction for improved nuclei detection in colon cancer histology images using a novel spatially constrained CNN classifier. |
| 296 | Smith KP et al.           | Automated interpretation of blood culture gram stains by use of a deep convolutional neural network                                                           | <a href="http://doi.org/10.1128/JCM.01521-17">http://doi.org/10.1128/JCM.01521-17</a>                 | C   | BF | T  | Automated image acquisition and classification of Gram stain using a CNN classifier.                                                               |
| 297 | Song Y et al.             | Accurate segmentation of cervical cytoplasm and nuclei based on multiscale convolutional network and graph partitioning                                       | <a href="http://doi.org/10.1109/TBME.2015.2430895">http://doi.org/10.1109/TBME.2015.2430895</a>       | S   | BF | CL | Accurate segmentation of cervical cells of Cervical Cytoplasm and Nuclei using a multiscale CNN and graph-partitioning-based method.               |
| 298 | Stegmaier J et al.        | Cell segmentation in 3D confocal images using supervoxel merge-forests with CNN-based hypothesis selection                                                    | <a href="http://doi.org/10.1109/ISBI.2018.8363598">http://doi.org/10.1109/ISBI.2018.8363598</a>       | S   | FL | T  | Automated segmentation of cell plants (meristem) clusters in volumetric microscopy images using a novel super-voxel CNN model.                     |
| 299 | Suleymanova I et al.      | A deep convolutional neural network approach for astrocyte detection                                                                                          | <a href="https://doi.org/10.1101/241505">https://doi.org/10.1101/241505</a>                           | C   | BF | CL | Fast and fully automated software for assessing the number of astrocytes using a CNN classifier.                                                   |
| 300 | tefko MÅ et al.           | Design Principles for Autonomous Illumination Control in Localization Microscopy                                                                              | <a href="https://doi.org/10.1101/295519">https://doi.org/10.1101/295519</a>                           | S   | FL | SB | Automated molecule density estimation by fluorescence spot segmentation and counting using a CNN model.                                            |
| 301 | Thierbach K et al.        | Combining Deep Learning and Active Contours Opens The Way to Robust Automated Analysis of Brain Cytoarchitectonics                                            | <a href="https://doi.org/10.1101/297689">https://doi.org/10.1101/297689</a>                           | S   | FL | CL | Improved segmentation of neural cell bodies from volumetric light-sheet microscopy using a CNN model.                                              |
| 302 | Tokuoka Y et al.          | Convolutional Neural Network-Based Instance Segmentation Algorithm to Acquire Quantitative Criteria of Early Mouse Development                                | <a href="https://doi.org/10.1101/324186">https://doi.org/10.1101/324186</a>                           | S   | FL | CL | Creation of a deep learning pipeline that segments each nucleus and adds different labels to the detected objects.                                 |

|     |                     |                                                                                                                                                                          |                                                                                                         |      |        |       |                                                                                                                                                       |
|-----|---------------------|--------------------------------------------------------------------------------------------------------------------------------------------------------------------------|---------------------------------------------------------------------------------------------------------|------|--------|-------|-------------------------------------------------------------------------------------------------------------------------------------------------------|
| 303 | Tschopp F et al.    | Efficient convolutional neural networks for pixelwise classification on heterogeneous hardware systems                                                                   | <a href="http://doi.org/10.1109/ISBI.2016.7493487">http://doi.org/10.1109/ISBI.2016.7493487</a>         | C    | EM     | T     | <b>Transformation of a classification CNN to a segmentation NN to increase speed of predictions.</b>                                                  |
| 304 | Van Valen DA et al. | Deep Learning Automates the Quantitative Analysis of Individual Cells in Live-Cell Imaging Experiments                                                                   | <a href="http://doi.org/10.1371/journal.pcbi.1005177">http://doi.org/10.1371/journal.pcbi.1005177</a>   | S    | BF     | CL    | <b>Improved bacterial and mammalian cells nuclei segmentation in fluorescent and phase images of the cytoplasm using CNN model.</b>                   |
| 305 | Vicar T et al.      | Label-free nuclear staining reconstruction in quantitative phase images using deep learning                                                                              | <a href="http://doi.org/10.1007/978-981-10-9035-6_43">http://doi.org/10.1007/978-981-10-9035-6_43</a>   | P    | BF, FL | CL, T | <b>Created artificial, fluorescence-like nuclei labeling from label-free images using CNNs.</b>                                                       |
| 306 | Vu QD et al.        | Micro and Macro Breast Histology Image Analysis by Partial Network Re-use                                                                                                | <a href="http://doi.org/10.1007/978-3-319-93000-8_102">http://doi.org/10.1007/978-3-319-93000-8_102</a> | C, S | BF     | T     | <b>Improved classification and segmentation of breast cancer images by combining architectural components and weights of a CNN model.</b>             |
| 307 | Wang C et al.       | Edge Detection of Cryptic Lamellipodia Assisted by Deep Learning                                                                                                         | <a href="https://doi.org/10.1101/181263">https://doi.org/10.1101/181263</a>                             | C    | FL     | CL    | <b>Automated edges detection in time-lapse collective cell migration movies by combining traditional analysis methods with CNN models.</b>            |
| 308 | Wang F et al.       | DeepPicker: A deep learning approach for fully automated particle picking in cryo-EM                                                                                     | <a href="http://doi.org/10.1016/j.jsb.2016.07.006">http://doi.org/10.1016/j.jsb.2016.07.006</a>         | C    | EM     | SB    | <b>Improved classifications of target particles from multiple molecular complexes using an iterative CNN-based workflow.</b>                          |
| 309 | Wang Q et al.       | Accurate and high throughput cell segmentation method for mouse brain nuclei using cascaded convolutional neural network                                                 | <a href="http://doi.org/10.1007/978-3-319-67434-6_7">http://doi.org/10.1007/978-3-319-67434-6_7</a>     | S    | FL     | CL    | <b>Improved segmentation by passing the probability map from one CNN as input to a subsequent CNN together with the original images.</b>              |
| 310 | Wang Y et al.       | Stem cell motion-tracking by using deep neural networks with multi-output                                                                                                | <a href="http://doi.org/10.1007/s00521-017-3291-2">http://doi.org/10.1007/s00521-017-3291-2</a>         | C    | BF     | CL    | <b>Automated mitosis detection and cell tracking using a CNN model with multiple outputs and a particle filter based sampling scheme.</b>             |
| 311 | Wen C et al.        | Deep-learning-based flexible pipeline for segmenting and tracking cells in 3D image time series for whole brain imaging                                                  | <a href="https://doi.org/10.1101/385567">https://doi.org/10.1101/385567</a>                             | C    | FL     | CL    | <b>Pixel-wise classification of cells using a 3D U-Net model, followed by watershed cell segmentation, and tracking using a feed-forward network.</b> |
| 312 | Weng S et al.       | Combining deep learning and coherent anti-Stokes Raman scattering imaging for automated differential diagnosis of lung cancer                                            | <a href="http://doi.org/10.1117/1.JBO.22.10.106017">http://doi.org/10.1117/1.JBO.22.10.106017</a>       | C    | BF     | T     | <b>Classification of lung cancer tissue using pre-trained CNN classifiers.</b>                                                                        |
| 313 | Wieslander H et al. | Deep Convolutional Neural Networks for Detecting Cellular Changes Due to Malignancy                                                                                      | <a href="https://doi.org/10.1109/iccvw.2017.18">https://doi.org/10.1109/iccvw.2017.18</a>               | C    | BF     | CL    | <b>Improved classification of oral and cervical cancer cells using pre-trained CNN models.</b>                                                        |
| 314 | Wollmann T et al.   | Deep residual Hough voting for mitotic cell detection in histopathology images                                                                                           | <a href="http://doi.org/10.1109/ISBI.2017.7950533">http://doi.org/10.1109/ISBI.2017.7950533</a>         | C    | BF     | CL    | <b>Improved mitotic cell detection by combining the ResNet classifier with Hough voting method.</b>                                                   |
| 315 | Wollmann T et al.   | Multi-channel deep transfer learning for nuclei segmentation in glioblastoma cell tissue images                                                                          | <a href="http://doi.org/10.1007/978-3-662-56537-7_83">http://doi.org/10.1007/978-3-662-56537-7_83</a>   | S    | FL     | CL    | <b>Automated cell segmentation by combining atrous spatial pyramid pooling with a pre-trained U-Net model.</b>                                        |
| 316 | Wu J et al.         | Unsupervised single-particle deep clustering via statistical manifold learning                                                                                           | <a href="http://arxiv.org/abs/1604.04539v2">http://arxiv.org/abs/1604.04539v2</a>                       | C    | EM     | SB    | <b>Unsupervised single-particle clustering using a manifold learning algorithm for deep learning model.</b>                                           |
| 317 | Xiao C et al.       | Deep contextual residual network for electron microscopy image segmentation in connectomics                                                                              | <a href="http://doi.org/10.1109/ISBI.2018.8363597">http://doi.org/10.1109/ISBI.2018.8363597</a>         | S    | EM     | CL, T | <b>Improved segmentation performance by utilizing multilevel contextual cues in a spatially efficient residual CNN model.</b>                         |
| 318 | Xiao C et al.       | An effective fully deep convolutional neural networks for mitochondria segmentation based on ATUM-SEM                                                                    | <a href="http://doi.org/10.1117/12.2293291">http://doi.org/10.1117/12.2293291</a>                       | S    | EM     | SB    | <b>Robust mitochondrial segmentation by fusing multiple pre-trained CNN models.</b>                                                                   |
| 319 | Xiao C et al.       | Effective automated pipeline for 3D reconstruction of synapses based on deep learning                                                                                    | <a href="http://doi.org/10.1186/s12859-018-2232-0">http://doi.org/10.1186/s12859-018-2232-0</a>         | C    | EM     | T     | <b>Automated localization and detection of synapses using adapted faster region-CNN model.</b>                                                        |
| 320 | Xie Y et al.        | Beyond Classification: Structured Regression for Robust Cell Detection Using Convolutional Neural Network                                                                | <a href="http://doi.org/10.1007/978-3-319-24574-4_43">http://doi.org/10.1007/978-3-319-24574-4_43</a>   | C    | BF     | CL    | <b>Automated detection of cells through encoded topological information using a final structured regression layer of a CNN classifier.</b>            |
| 321 | Xie W et al.        | Microscopy cell counting and detection with fully convolutional regression networks                                                                                      | <a href="http://doi.org/10.1080/21681163.2016.1149104">http://doi.org/10.1080/21681163.2016.1149104</a> | C    | FL     | CL    | <b>Automated cell counting and detection using fully convolutional regression networks to estimate density maps</b>                                   |
| 322 | Xu M et al.         | A deep convolutional neural network for classification of red blood cells in sickle cell anemia                                                                          | <a href="http://doi.org/10.1371/journal.pcbi.1005746">http://doi.org/10.1371/journal.pcbi.1005746</a>   | C    | BF     | CL    | <b>Classification of individual red blood cells images using a patch-based CNN classifier.</b>                                                        |
| 323 | Xu YKT et al.       | Deep learning for high-throughput quantification of oligodendrocyte ensheathment: a UNet architecture to extract multiple morphological parameters from individual cells | <a href="https://doi.org/10.1101/389932">https://doi.org/10.1101/389932</a>                             | S    | BF, FL | SB    | <b>Improved myelin segmentation within cells using a UNet architecture.</b>                                                                           |
| 324 | Xue Y et al.        | A novel framework to integrate convolutional neural network with compressed sensing for cell detection                                                                   | <a href="http://doi.org/10.1109/ICIP.2017.8296696">http://doi.org/10.1109/ICIP.2017.8296696</a>         | C    | BF     | CL    | <b>Automated detection and localization of cells by combining compressed-sensing based output encoding with CNN classifier.</b>                       |
| 325 | Yang L et al.       | BoxNet: Deep Learning Based Biomedical Image Segmentation Using Boxes Only Annotation                                                                                    | <a href="https://arxiv.org/abs/1806.00593">https://arxiv.org/abs/1806.00593</a>                         | S    | BF, EM | CL, T | <b>Improved localization of structures by combining weakly supervised deep learning box annotation and grid search for a CNN model.</b>               |

|     |                |                                                                                                                          |                                                                                                         |   |        |           |                                                                                                                                                        |
|-----|----------------|--------------------------------------------------------------------------------------------------------------------------|---------------------------------------------------------------------------------------------------------|---|--------|-----------|--------------------------------------------------------------------------------------------------------------------------------------------------------|
| 326 | Yi F et al.    | Automated red blood cells extraction from holographic images using fully convolutional neural networks                   | <a href="http://doi.org/10.1364/BOE.8.004466">http://doi.org/10.1364/BOE.8.004466</a>                   | S | BF     | CL        | <b>Integration of FCN with marker-controlled watershed segmentation on red blood cells.</b>                                                            |
| 327 | Yoo I et al.   | ssEMnet: Serial-section electron microscopy image registration using a spatial transformer network with learned features | <a href="http://doi.org/10.1007/978-3-319-67558-9_29">http://doi.org/10.1007/978-3-319-67558-9_29</a>   | P | EM     | T         | <b>Automated image alignment by combining a spatial transformer network and a convolutional autoencoder.</b>                                           |
| 328 | Yu C et al.    | Acral melanoma detection using a convolutional neural network for dermoscopy images                                      | <a href="http://doi.org/10.1371/journal.pone.0193321">http://doi.org/10.1371/journal.pone.0193321</a>   | C | BF     | T         | <b>Automated detection of acral melanoma in dermoscopy images using pre-trained CNN classifiers.</b>                                                   |
| 329 | Yu H et al.    | Phenotypic Antimicrobial Susceptibility Testing with Deep Learning Video Microscopy                                      | <a href="http://doi.org/10.1021/acs.analchem.8b01128">http://doi.org/10.1021/acs.analchem.8b01128</a>   | C | BF     | CL        | <b>Pathogen concentrations determination in static images containing single cell features of bacteria using a CNN classifier.</b>                      |
| 330 | Yu L et al.    | Automated Melanoma Recognition in Dermoscopy Images via Very Deep Residual Networks                                      | <a href="http://doi.org/10.1109/TMI.2016.2642839">http://doi.org/10.1109/TMI.2016.2642839</a>           | C | BF     | T         | <b>Segmentation and classification of melanoma in dermoscopy images by integrating a very deep CNN with a very deep residual CNN classifier.</b>       |
| 331 | Yuan Y et al.  | Automatic Skin Lesion Segmentation Using Deep Fully Convolutional Networks with Jaccard Distance                         | <a href="http://doi.org/10.1109/TMI.2017.2695227">http://doi.org/10.1109/TMI.2017.2695227</a>           | S | BF     | T         | <b>Improved skin lesion segmentation by combining Jaccard distance based loss function with a CNN for imbalanced foreground and background pixels.</b> |
| 332 | Zaimi A et al. | AxonDeepSeg: Automatic axon and myelin segmentation from microscopy data using convolutional neural networks             | <a href="http://doi.org/10.1038/s41598-018-22181-4">http://doi.org/10.1038/s41598-018-22181-4</a>       | S | EM     | SB        | <b>An open-source software package for axon and myelin segmentation of microscopic images using an adapted U-Net model.</b>                            |
| 333 | Zeng T et al.  | DeepEM3D: approaching human-level performance on 3D anisotropic EM image segmentation                                    | <a href="http://doi.org/10.1093/bioinformatics/btx188">http://doi.org/10.1093/bioinformatics/btx188</a> | S | EM     | SB        | <b>Improved volumetric neurite segmentation using a hybrid 3D-2D CNN model accounting for anisotropy.</b>                                              |
| 334 | Zhang H et al. | High-throughput high-resolution Generated Adversarial Network Microscopy                                                 | <a href="http://arxiv.org/abs/1801.07330v1">http://arxiv.org/abs/1801.07330v1</a>                       | P | BF, FL | T, CL, SB | <b>Super-resolution reconstruction from a large field of view by combining GANs with wide-field light images.</b>                                      |
| 335 | Zhou Y et al.  | Cell mitosis detection using deep neural networks                                                                        | <a href="http://doi.org/10.1016/j.knosys.2017.08.016">http://doi.org/10.1016/j.knosys.2017.08.016</a>   | C | BF     | CL        | <b>Automatic identification of potential mitosis events using a CNN model and false-positive reduction using a 3D-CNN classifier.</b>                  |
| 336 | Zhou Z et al.  | DeepNeuron: an open deep learning toolbox for neuron tracing                                                             | <a href="http://doi.org/10.1186/s40708-018-0081-2">http://doi.org/10.1186/s40708-018-0081-2</a>         | C | BF     | CL        | <b>Improved detection and tracing of neurons in different image conditions using a DeepNeuron within CNN modules.</b>                                  |
| 337 | Zhu R.         | An Extended Type Cell Detection and Counting Method based on FCN                                                         | <a href="http://doi.org/10.1109/BIBE.2017.00-79">http://doi.org/10.1109/BIBE.2017.00-79</a>             | C | BF, EM | CL        | <b>Automated counting and detection of cells by utilizing a CNN model.</b>                                                                             |
| 338 | Zhu Y et al.   | A deep convolutional neural network approach to single-particle recognition in cryo-electron microscopy                  | <a href="http://doi.org/10.1186/s12859-017-1757-y">http://doi.org/10.1186/s12859-017-1757-y</a>         | C | EM     | SB        | <b>Single-particle recognition from noisy cryo-EM micrographs using a recursively trained CNN classifier.</b>                                          |
